1 **Co-ordinated Ras and Rac activity shapes macropinocytic cups**  
2 **and enables phagocytosis of geometrically diverse bacteria**

3

4 Catherine M. Buckley<sup>1</sup>, Henderikus Pots<sup>2</sup>, Aurelie Gueho<sup>3\$</sup>, Ben A. Phillips<sup>1</sup>, Bernd  
5 Gilsbach<sup>4</sup>, Anton Nikolaev<sup>1</sup>, Thierry Soldati<sup>3</sup>, Andrew J. Parnell<sup>5</sup>, Arjan Kortholt<sup>2</sup>  
6 and Jason S. King<sup>1\*</sup>

7

8 <sup>1</sup>Department of Biomedical Sciences, University of Sheffield, Sheffield, UK.

9 <sup>2</sup>Department of Cell Biochemistry, University of Groningen, Groningen,  
10 Netherlands.

11 <sup>3</sup>Department of Biochemistry, Faculty of Sciences, Sciences II, University of  
12 Geneva, Geneva, Switzerland

13 <sup>4</sup>German Centre for Neurodegenerative Diseases, Tübingen, Germany

14 <sup>5</sup>Department of Physics and Astronomy, University of Sheffield, Sheffield, UK

15 \$ current address: Fish Physiology and Genomics Institute, INRA, Rennes, France

16

17 \*Corresponding author: [Jason.King@sheffield.ac.uk](mailto:Jason.King@sheffield.ac.uk)

## 1 **Abstract**

2 Engulfment of extracellular material by phagocytosis or macropinocytosis  
3 depends on the ability of cells to generate specialised cup shaped protrusions.  
4 To effectively capture and internalise their targets, these cups are organised into  
5 a ring or ruffle of actin-driven protrusion encircling a static interior domain.  
6 These functional domains depend on the combined activities of multiple Ras and  
7 Rho family small GTPases, but how their activities are integrated and  
8 differentially regulated over space and time is unknown. Here, we show that the  
9 amoeba *Dictyostelium discoideum* coordinates Ras and Rac activity using the  
10 multidomain protein RGBARG (RCC1, RhoGEF, BAR and RasGAP-containing  
11 protein). We find RGBARG uses a tripartite mechanism of Ras, Rac and  
12 phospholipid interactions to localise at the protruding edge and interface with  
13 the interior of both macropinocytic and phagocytic cups. There, RGBARG shapes  
14 the protrusion by driving Rac activation at the rim whilst suppressing expansion  
15 of the active Ras interior domain. Consequently, cells lacking RGBARG form  
16 enlarged, flat interior domains unable to form large macropinosomes. During  
17 phagocytosis, we find that disruption of *RGBARG* causes a geometry-specific  
18 defect in engulfing rod-shaped bacteria and ellipsoidal beads. This demonstrates  
19 the importance of co-ordinating small GTPase activities during engulfment of  
20 more complex shapes and thus the full physiological range of microbes, and how  
21 this is achieved in a model professional phagocyte.

## 1 Introduction

2 The capture and engulfment of extracellular material serves a number of  
3 important cellular functions. Best understood is the clearance of pathogenic  
4 microbes or apoptotic cells by phagocytic immune cells, but the engulfment of  
5 fluid by the related process of macropinocytosis also plays important functions  
6 by allowing cells to capture antigens or other factors from their environment  
7 such as nutrients to support growth (Bloomfield and Kay, 2016; Commisso et al.,  
8 2013; Norbury et al., 1995; Sallusto et al., 1995; Swanson and King, 2019).

9

10 To capture extracellular material, cells must encircle and isolate their target  
11 within a vesicle. This can be achieved by several mechanisms, but the best  
12 understood and evolutionarily widespread involves the extension of a circular  
13 cup or ruffle-shaped protrusion from the cell surface to enwrap the target and  
14 close to internalise it (Buckley and King, 2017; Kaplan, 1977; Swanson, 2008;  
15 Veltman et al., 2016). Whilst many components of cup formation have been  
16 identified, how they are co-ordinated in space and time is poorly understood.  
17 Here we describe a novel mechanism used by the amoebae *Dictyostelium*  
18 *discoideum* to integrate different signaling elements and form complex-shaped  
19 protrusions that efficiently mediate engulfment.

20

21 Macropinocytic and phagocytic protrusions are formed by localised actin  
22 polymerisation at the plasma membrane, using much of the same machinery that  
23 generates pseudopods and lamellipodia during cell migration (King and Kay,  
24 2019; Swanson, 2008). Whilst migratory protrusions only need the cell to define  
25 a simple patch of actin polymerisation, forming a cup requires a higher level of  
26 organisation, with the protrusive activity restricted to a ring encircling a static  
27 interior domain. During phagocytosis this is aided by the presence of a particle to  
28 act as a physical scaffold and locally activate receptors. These interactions are  
29 proposed to guide engulfment by a zipper mechanism (Griffin et al., 1975;  
30 Tollis et al., 2010). However, macropinocytic cups self-organise with an almost  
31 identical structure in the absence of any external spatial cues (Veltman et al.,  
32 2016). Cup formation can therefore occur spontaneously by the intrinsic  
33 dynamics of the underlying signaling.

1

2 Recent studies in *Dictyostelium* proposed a model whereby the cup interior is  
3 defined by spontaneous localised activation of the small GTPase Ras and  
4 consequent accumulation of the phospholipid PIP<sub>3</sub> (Veltman et al., 2016). This  
5 patch appears to restrict actin polymerisation to its periphery to create a  
6 protrusive ring. How this is achieved is unknown, but in at least *Dictyostelium* it  
7 may depend on the activity of the PIP<sub>3</sub>-activated Protein kinase B/Akt (Williams  
8 et al., 2019). Both active Ras and PIP<sub>3</sub> also accumulate at cups in mammalian  
9 cells (Araki et al., 2007; Marshall et al., 2001; Vieira et al., 2001) and Ras  
10 activation is sufficient to drive ruffling and macropinocytosis in cancer cells (Bar-  
11 Sagi and Feramisco, 1986; Commisso et al., 2013). PI3K inhibition also  
12 completely blocks macropinocytosis (Amyere et al., 2000; Araki et al., 1996;  
13 Hoeller et al., 2013; Veltman et al., 2014) as well as phagocytosis of large  
14 particles by macrophages (Araki et al., 1996; Cox et al., 1999; Schlam et al.,  
15 2015). Ras and PIP<sub>3</sub> therefore play a general role in macropinosome and  
16 phagosome organisation across evolution.

17

18 Other small GTPases are also involved in cup formation. Active Rac1 overlaps  
19 with Ras activity in the cup interior in both macrophages and *Dictyostelium*  
20 (Hoppe and Swanson, 2004; Veltman et al., 2016). Rac1 is a direct activator of  
21 the SCAR/WAVE complex, which drives activation of actin polymerisation via the  
22 ARP2/3 complex (Eden et al., 2002; Machesky and Insall, 1998). Consistent with  
23 this, Rac1 is required for macropinosome formation in dendritic cells (West et  
24 al., 2000) and optogenetic Rac1 activation is sufficient to drive ruffling and  
25 macropinocytosis in macrophages (Fujii et al., 2013). Expression of  
26 constitutively active Rac1 also leads to excessive actin at macropinocytic cups in  
27 *Dictyostelium* (Dumontier et al., 2000). Therefore, whilst Ras appears to define  
28 the cup interior, Rac1 is important for regulating actin protrusions, as it is does  
29 during cell migration.

30

31 The presence of active Rac1 throughout the cup interior is at odds with the  
32 tightly restricted SCAR/WAVE activity and protrusion at the extending rim  
33 (Veltman et al., 2016). A further layer of regulation must therefore exist. This is



1 likely provided by the small GTPase CDC42 which is also required for Fc- $\gamma$ -  
2 receptor mediated phagocytosis and collaborates with Rac1 during engulfment  
3 of large particles (Caron and Hall, 1998; Cox et al., 1997; Massol et al., 1998;  
4 Schlam et al., 2015). In contrast to Rac1, active CDC42 is restricted to the  
5 protrusive cup rim in macrophages indicating differential regulation and  
6 functionality (Hoppe and Swanson, 2004). In *Dictyostelium* however, no clear  
7 CDC42 orthologue has been identified.

8

9 Cup formation requires integrated spatio-temporal control over multiple  
10 GTPases. This must be able to self-organise in the absence of external cues  
11 during macropinocytosis, and robust enough to phagocytose physiological  
12 targets of varying size and shape. Small GTPase activity is controlled by a large  
13 family of proteins such as GTPase Exchange Factors (GEFs) which promote the  
14 GTP-bound active form, and GTPase Activating Proteins (GAPs) which stimulate  
15 hydrolysis and transition to a GDP-bound inactive state. In this study, we  
16 characterise a previously unstudied dual GEF and GAP protein in *Dictyostelium*  
17 that integrates Ras, Rac and lipid signaling. This provides a mechanism to  
18 coordinate the cup interior with the protrusive rim, allowing efficient  
19 macropinosome formation and the engulfment of diverse bacteria of differing  
20 geometry.

## 21 **Results**

### 22 **Identification of a novel BAR-domain containing protein recruited to cups**

23

24 Our initial hypothesis was that cells may use the different membrane curvature  
25 at the protrusive rim compared to the cup base to recognise and differentially  
26 regulate cup shape. Membrane curvature can recruit specific proteins containing  
27 BAR (Bin-Amphiphysin-Rvs) domains (Peter et al., 2004). These are often found  
28 in multidomain proteins, including several involved in GTPase regulation and  
29 trafficking (Aspenstrom, 2014). To identify candidate proteins involved in  
30 macropinocytosis, we therefore searched the *Dictyostelium* genome for BAR  
31 domain-containing proteins. Excluding proteins of known localisation or  
32 function, we systematically cloned each candidate and expressed them as both N-

1 and C- terminal GFP-fusions in axenic Ax2 cells. Using this strategy we  
2 successfully cloned 9 previously uncharacterised BAR-containing proteins and  
3 observed their localisation in live cells by fluorescence microscopy. Of these, 6  
4 were expressed at detectable levels (Figure 1A).

5

6 DDB\_G0284997, DDB\_G0305372 and DDB\_G0285851 were associated with small  
7 puncta at the plasma membrane, consistent with the well-characterised role of  
8 BAR domain proteins in clathrin mediated endocytosis (Dawson et al., 2006).

9 DDB\_G0276447 localised to intracellular vesicles too small to be

10 macropinosomes, and GFP-DDB\_G0272368 was exclusively observed in the

11 nucleus. Only one of the proteins tested (DDB\_G0269934) localised to what

12 appeared to be the protrusive regions of macropinocytic cups.

13

14 DDB\_G0269934 is a 223 kDa multidomain protein and also contains Regulator of  
15 Chromatin Condensation (RCC1), RhoGEF and RasGAP domains (Figure 1B).

16 DDB\_G0269934 has not previously been described and due to its domain

17 organisation we will subsequently refer to it as RGBARG (RCC1, GEF, BAR and

18 GAP domain containing protein). How Ras and Rac activity are coordinated in

19 space and time to generate a 3-dimensional cup shaped protrusion is not known.

20 Combining BAR, GEF and GAP activities in a single protein potentially provides

21 an elegant mechanism to organise engulfment. Therefore the function and

22 regulation of RGBARG was investigated in detail.

23

24 Examining RGBARG-GFP dynamics by timelapse fluorescence microscopy

25 confirmed strong enrichment at the protrusive rim of both macropinocytic and

26 phagocytic cups that disappeared rapidly after engulfment (Figure 1C and D,

27 Videos 1 and 2). Co-expression with the PIP<sub>3</sub> reporter PH<sub>CRAC</sub>-RFP that demarks

28 the cup interior confirmed RGBARG-GFP localised specifically to the periphery of

29 this signaling domain (Figure 1E-H, and Video 3). Importantly, this differs from

30 the RasGAP NF1, which localises throughout the cup interior (Bloomfield et al.,

31 2015). RGBARG may therefore play a specific role in organising cup dynamics

32 and engulfment.

33

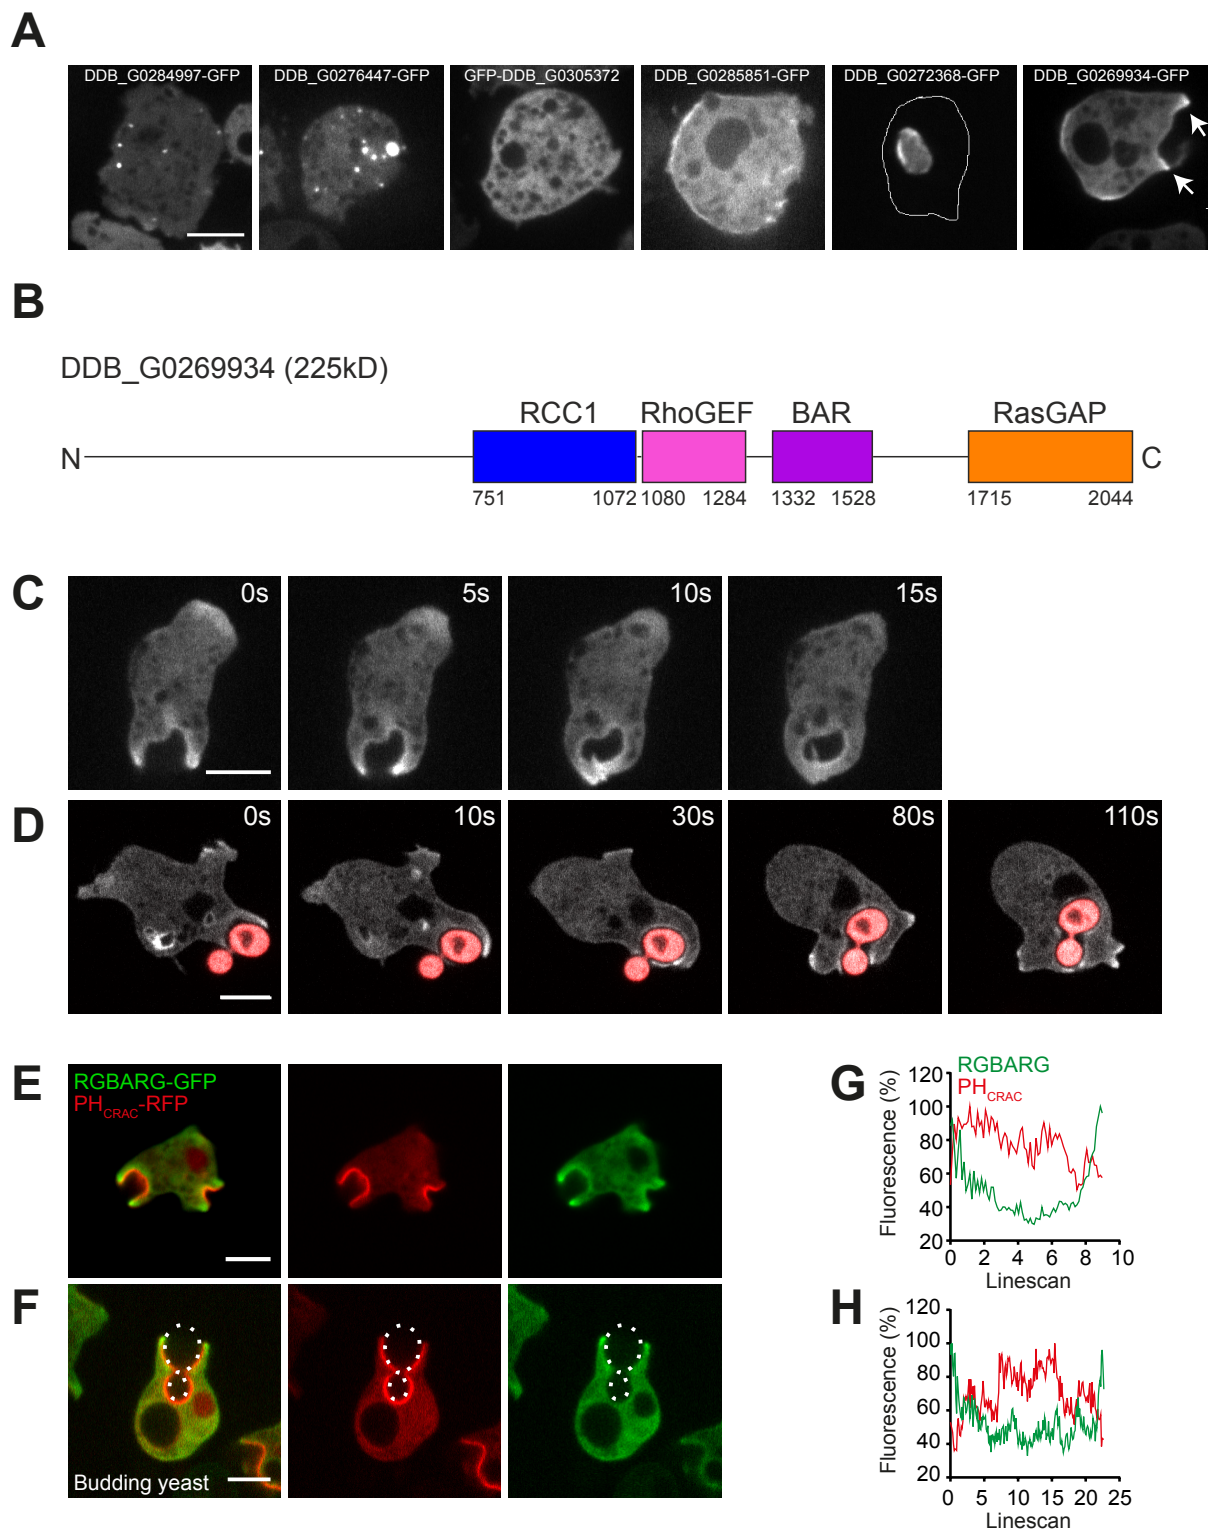

**Figure 1: Identification of BAR domain proteins associated with macropinocytosis.** (A) Uncharacterised BAR-domain containing proteins were expressed as GFP-fusions in Ax2 Dictyostelium cells. Images are maximum intensity projections of confocal Z-stacks. (B) Illustrates the domain organisation of DDB\_G0269934/RGBARG. (C) Time series of spinning disc images of RGBARG-GFP recruitment during macropinocytosis and (D) phagocytosis of TRITC-labeled heat-killed budding yeast. (E) and (F) show the localization of RGBARG-GFP relative to the PIP<sub>3</sub> reporter PH<sub>CRAC</sub>-RFP during macropinocytosis and phagocytosis respectively. (G) and (H) show the relative intensity profiles of each fluorescent protein in these images. Linescans were drawn along the cup interior from protrusive tip-to-tip. All scale bars denote 5  $\mu$ m.

## 1 **RGBAR regulates cup signaling and macropinosome formation**

2

3 To test for a functional role in engulfment a 3.6 Kb central section of *RGBARG*  
4 gene (containing the RCC1 RhoGEF and BAR domains) was deleted and replaced  
5 with a blasticidin selection cassette by homologous recombination (Figure 2  
6 supplement 1). Independent clones were isolated (JSK02 and 03) and shared  
7 comparable phenotypes. In the following experiments strain JSK02 was used  
8 unless otherwise stated with effects of *RGBARG* mutation validated by rescue  
9 experiments.

10

11 To check for defects in macropinosome formation, cells were incubated with  
12 FITC-dextran, a pH sensitive dye that is quenched at low pH. As macropinosomes  
13 acidify in under two minutes in *Dictyostelium*, and images were acquired within  
14 the 30 minutes required to transit to neutral post-lysosomes, intracellular FITC-  
15 dextran is only visible in nascent macropinosomes (Figure 2A). From confocal Z-  
16 stacks of live cells, we found that *RGBARG*<sup>-</sup> cells formed significantly smaller  
17 macropinosomes than parental controls, measuring  $0.5 \pm 0.1 \mu\text{m}^3$  compared to  
18  $1.5 \pm 0.2 \mu\text{m}^3$  in Ax2 (Figure 2B). This phenotype could be completely rescued by  
19 re-expression of RGBARG-GFP. *RGBARG*<sup>-</sup> cells also produced more  
20 macropinosomes ( $2.6 \pm 0.2$  per cell compared to  $2.2 \pm 0.1$  for Ax2) leading to no  
21 net change in either total fluid uptake or axenic growth (Figure 2C-E). RGBARG is  
22 therefore functionally important for the dynamics of macropinocytosis but not  
23 essential for engulfment.

24

25 To understand why *RGBARG*<sup>-</sup> cells form smaller macropinosomes we followed  
26 their formation by fluorescence microscopy. Using the PH<sub>CRAC</sub>-GFP reporter we  
27 found in *RGBARG*<sup>-</sup> cells had larger and more numerous patches of PIP<sub>3</sub> than  
28 controls, averaging  $3.8 \pm 1.1$  patches per confocal section with an average length  
29 of  $5.5 \pm 2.4 \mu\text{m}$  compared to  $1.6 \pm 0.6$  patches averaging  $4.4 \pm 1.2 \mu\text{m}$  in Ax2 (Figure  
30 3A-C). Similarly enlarged patches were also observed using the active Ras  
31 reporter GFP-RBD (the Ras binding domain of Raf1, Figure 3B-C and Figure 3  
32 Supplement 1A). During these experiments we also noted that *RGBARG*<sup>-</sup> cells a  
33 mild cytokinesis defect with  $10 \pm \%$  containing >2 nuclei, compared to 5% of

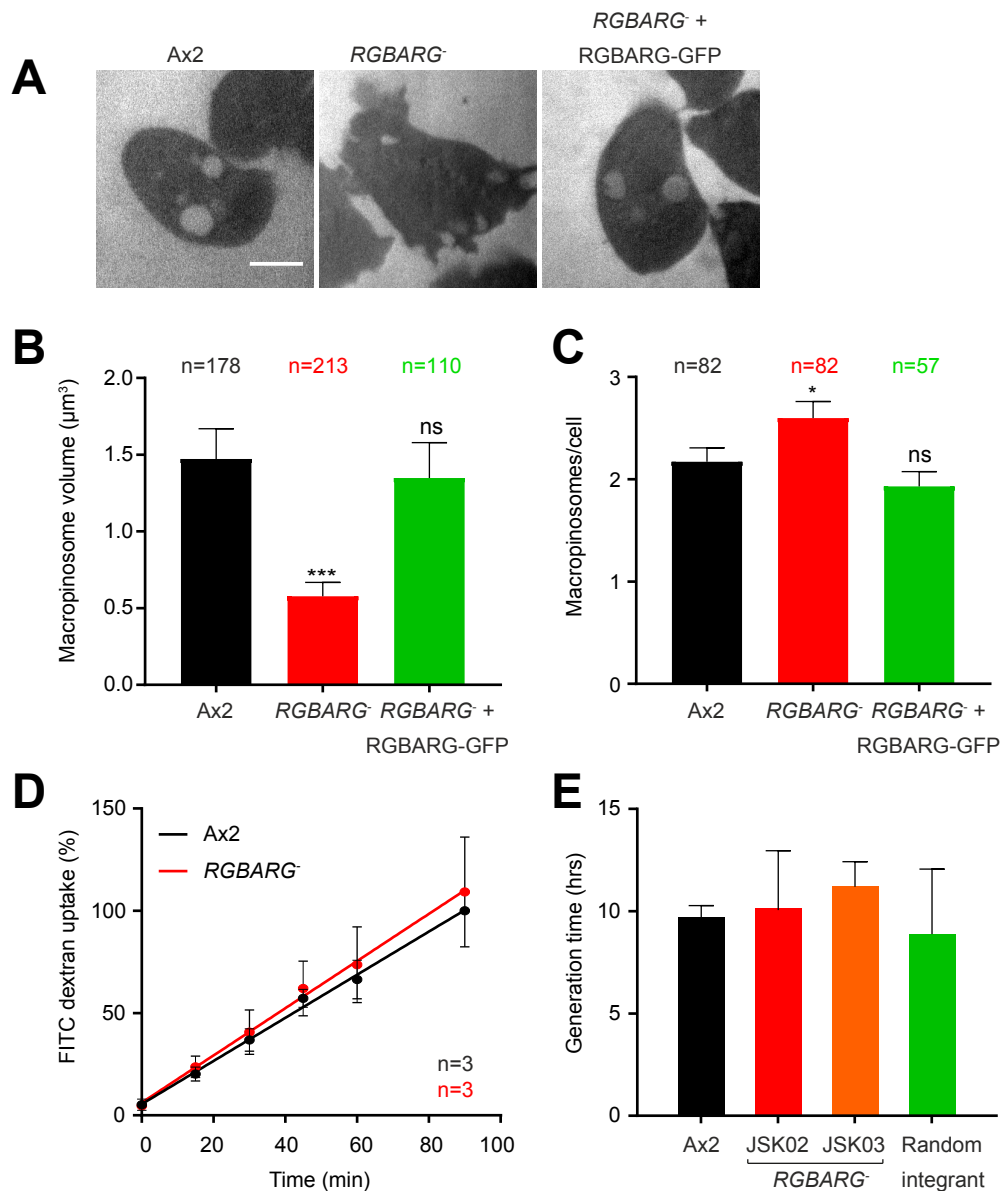

**Figure 2: RGBARG<sup>-</sup> cells produce more, but smaller macropinosomes.** (A) Confocal images of the indicated cell lines incubated in FITC-dextran for 10 minutes. The pH-sensitive FITC is only visible in pre-acidification macropinosomes <2 minutes after formation. The average volume of macropinosomes formed is shown in (B) and the number of macropinosomes per cell is shown in (C). n indicates the total number of macropinosomes or cells measured over 3 independent experiments. (D) Total fluid uptake measured by FITC dextran uptake over time, measured in a fluorimeter. (E) Growth rate of RGBARG mutants in axenic culture compared to the Ax2 parental cell line and a random integrant control from 3 independent experiments. All graphs show means ± SEM, \* P<0.05, \*\*\* P<0.001 as determined by Students T-test.

1 controls. This is consistent with the cytokinesis defects described in *PTEN*  
2 mutants which also have excessive PIP<sub>3</sub> accumulation (Janetopoulos et al., 2005)  
3 and all multinucleate cells were excluded from analysis.

4  
5 To understand how the enlarged Ras and PIP<sub>3</sub> patches in *RGBARG*<sup>-</sup> cells give rise  
6 to smaller macropinosomes we studied their formation over time in 3D. As  
7 recently described, the macropinocytic cups of Ax2 cells form by expanding  
8 around a defined spontaneous patch of PIP<sub>3</sub> (Veltman et al., 2016). These cups  
9 subsequently close, usually forming one, or sometimes two, large  
10 macropinosomes accompanied by termination of PIP<sub>3</sub> signaling on both the new  
11 vesicle and the cell surface (Figure 3D and Video 4). This process is relatively  
12 consistent, with each PIP<sub>3</sub> patch lasting an average of 150 seconds (Figure 3  
13 Supplement 1B). In *RGBARG*<sup>-</sup> cells however, whilst PH<sub>CRAC</sub>-GFP still disappeared  
14 from internalised vesicles, the plasma membrane domains were much more  
15 stable. Whilst PIP<sub>3</sub> patches frequently split, they rarely dissipated completely  
16 and often lasted longer than each of the 30 minute movies recorded (Figure 3E  
17 and Video 5). It was therefore not possible to meaningfully measure the lifetime  
18 of surface PIP<sub>3</sub> (and by extension Ras) signaling in *RGBARG*<sup>-</sup> cells. As *RGBARG* is  
19 restricted to the periphery of Ras signaling domains it appears to restrict both  
20 lateral expansion of activated Ras and termination of Ras/PIP<sub>3</sub> signaling upon  
21 cup completion.

22  
23 Although extinction of PIP<sub>3</sub> signaling did not accompany cup closure in *RGBARG*<sup>-</sup>  
24 cells, numerous small vesicles could be observed continuously budding from the  
25 base of the ruffles when folds of membrane collapsed in on themselves. This  
26 explains why these cells form more frequent but smaller macropinosomes  
27 (Figure 2). We speculate that this indicates that the entirety of the PIP<sub>3</sub> patch is  
28 potentially fusogenic and can internalise vesicles by simply folding onto itself  
29 rather than requiring a specific mechanism to orchestrate closure and fission at  
30 the rim. How this might be achieved mechanistically is unclear, but is  
31 reminiscent of the less organised, more ruffle-like macropinosome formation  
32 observed in serum stimulated mammalian epithelial cells, or Ras transformed  
33 cancer cell lines (Williamson and Donaldson, 2019).



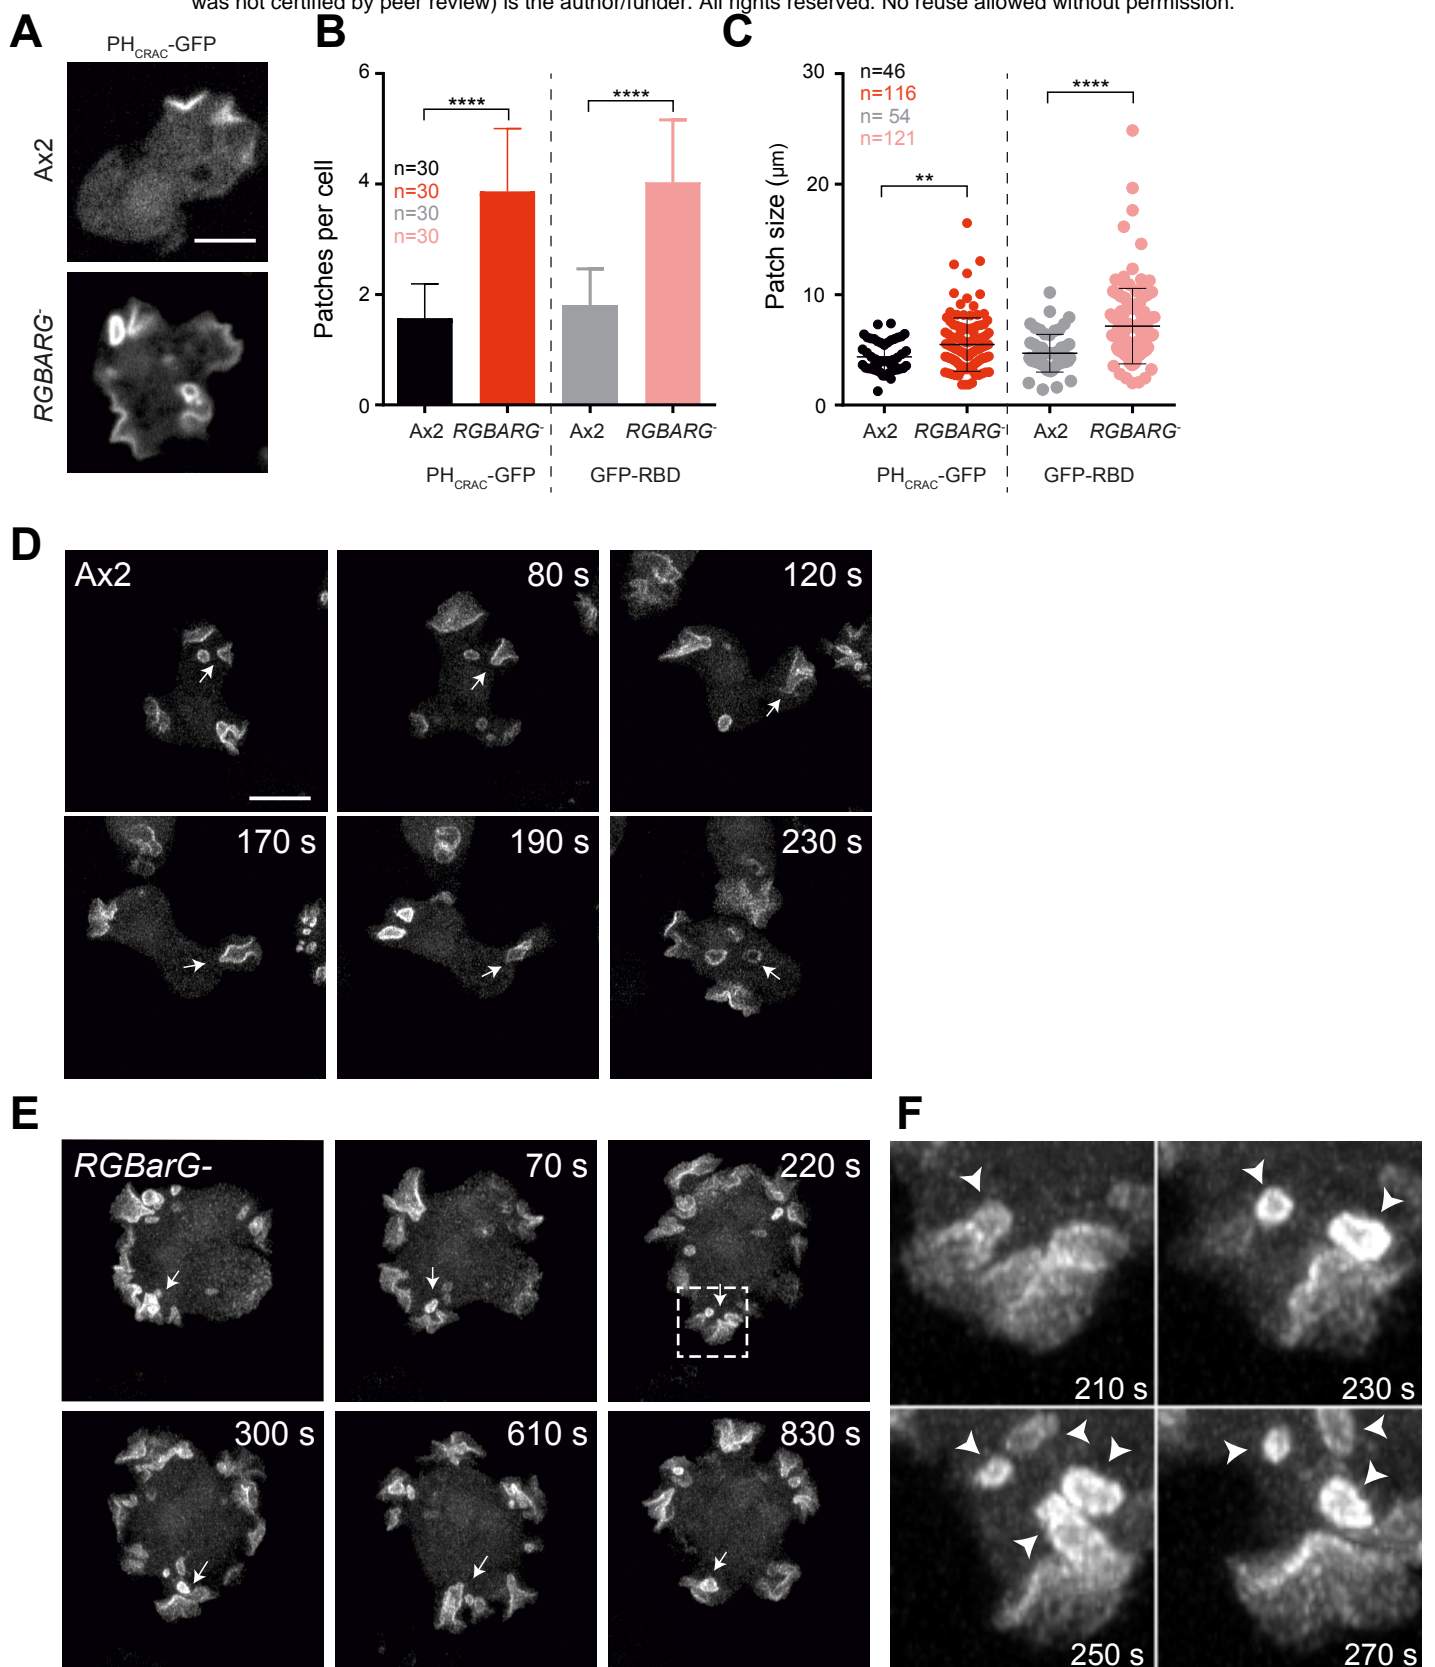

**Figure 3: Dynamics of macropinosome formation in RGBARG- cells.** (A) Membrane localization of the PIP<sub>3</sub> probe PH<sub>CRAC</sub>-GFP. Images are single confocal sections taken by spinning disc microscopy. The number of patches of PH<sub>CRAC</sub>-GFP or the active Ras probe GFP-RBD per cell in single plane through the middle of each cell is quantified in (B). The average size of each patch is shown in (C). n is the total number of cells or patches measured over 3 independent experiments. Error bars show the mean ± standard deviation, \*\* P<0.01, \*\*\* P<0.001, Mann-Whitney T-test. (D) and (E) Time series of a maximum intensity projection through the entire depth of PH<sub>CRAC</sub>-GFP expressing cells. (D) Shows Ax2 cells, indicating the formation, closure and subsequent extinction of PH<sub>CRAC</sub>-GFP patch at the cell surface (arrow). (E) Shows an equivalent movie of RGBARG- cells, where the PH<sub>CRAC</sub>-GFP patch remains after closure (arrow). (F) Is an enlargement of the boxed area in (E), showing multiple vesicles forming from a single, large PH<sub>CRAC</sub>-GFP patch (arrow-heads). All scale bars indicate 5 μm.

1

## 2 **GEF, GAP and BAR domain interactions each contribute to RGBARG**

### 3 **localisation**

4

5 Localisation of RGBARG at the interface between the cup interior and the  
6 protrusive rim is likely to be critical to effectively control the shape and  
7 dynamics of these domains during engulfment. This will position its RhoGEF  
8 activity where protrusion is promoted and its RasGAP activity where it can  
9 restrain expansion of the interior, leading to the organised cup formation  
10 observed in Ax2 cells and absent in *RGBARG*<sup>-</sup> mutants.

11

12 To dissect the mechanisms of RGBARG recruitment we tested the effect of  
13 deleting each protein domain in turn. To quantify RGBARG enrichment across  
14 the cup, linescans from cup tip to tip were normalised to non-protruding regions  
15 of the same cell and averaged across multiple cells (Figure 4A and B). GFP-fused  
16 to the cyclic AMP receptor (cAR1-GFP) localises uniformly to the plasma  
17 membrane and was used as a control (Figure 4C and D). This method confirmed  
18 RGBARG-GFP was enriched 3-fold at the protruding edges of macropinosytic  
19 cups and allowed us to quantify how each protein domain contributes to  
20 recruitment at the cup (Figure 4 and supplement).

21

22 Removal of the RCC1 domain had no effect on localisation and was able to fully  
23 rescue the ability of *RGBARG*<sup>-</sup> cells to form large macropinosomes (Figure 4E-H).  
24 In contrast, deletion of either the RhoGEF or BAR domains caused RGBARG to  
25 become uniformly cytosolic and did not rescue (Figure 4E-H). In the absence of  
26 the RasGAP domain however, RGBARG was still recruited to the plasma  
27 membrane but was much more broadly distributed throughout the cup and  
28 significantly less enriched at the protruding rim (Figure 4G). *RGBARG* $\Delta$ GAP-GFP  
29 was also unable to rescue macropinosome formation (Figure 4H). Co-expression  
30 of PH<sub>CRAC</sub>-RFP confirmed that *RGBARG* $\Delta$ RasGAP-GFP was no longer excluded  
31 from PIP<sub>3</sub>, and therefore active Ras domains (Figure 4 supplement 2A). RasGAP  
32 interactions therefore restrict RGBARG to the periphery of the cup interior  
33 domain.



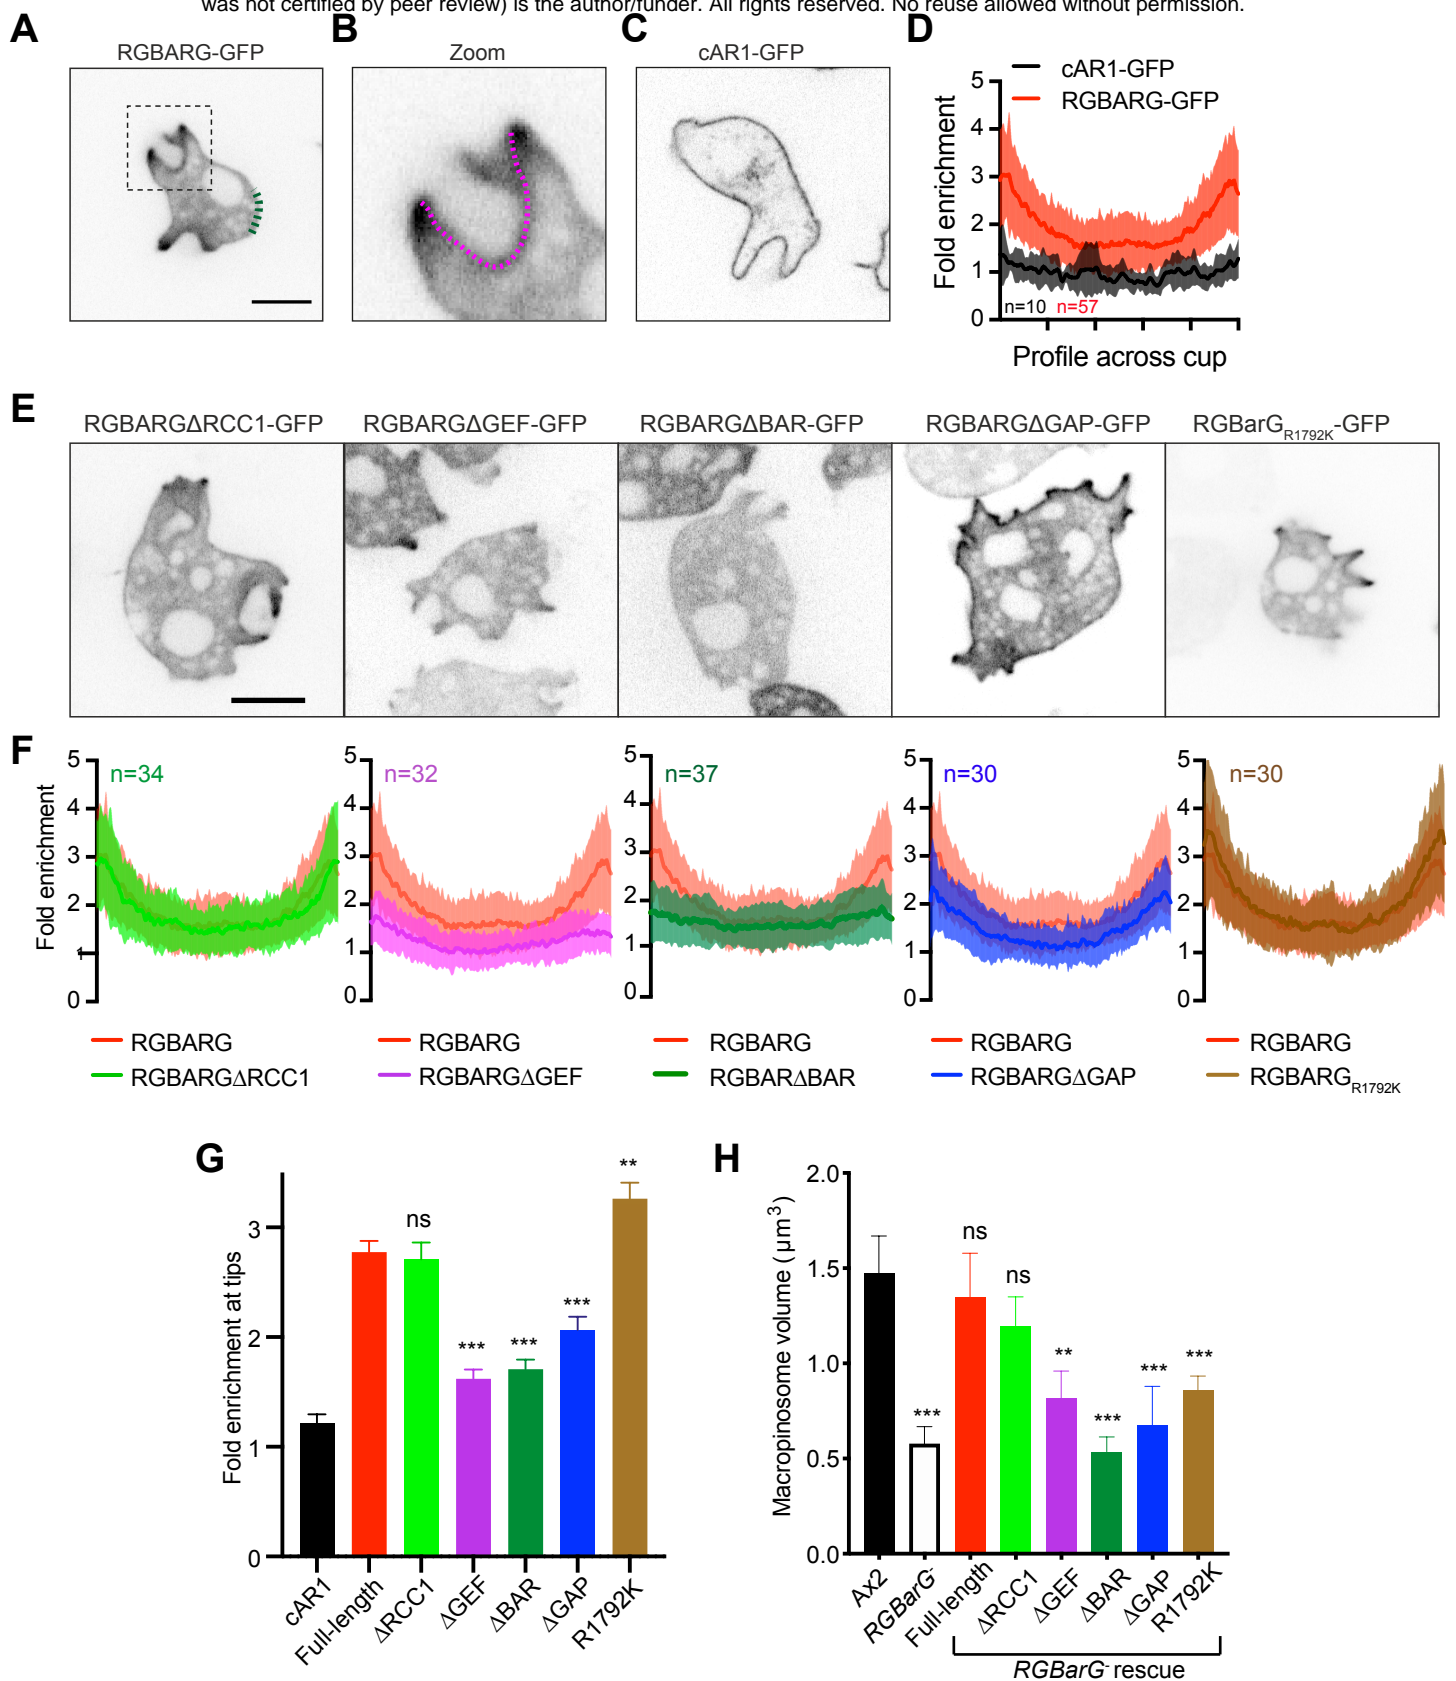

**Figure 4: Multiple interaction regulate RGBARG recruitment at the cup.** Full-length RGBARG or mutants lacking each domain in turn were expressed as GFP-fusions in RGBARG<sup>-</sup> cells. (A) Shows an example of full-length RGBARG-GFP. Enrichment was measured relative to the average intensity of a non-protrusive membrane region (green dotted line). The boxed region is enlarged in (B), showing an example of the line measured from the rim along the cup interior. (C) Shows the uniform localization of cAR1-GFP used as a control. (D) Averaged, normalized linescans along the cup from multiple cells, demonstrating a 3-fold enrichment of RGBARG-GFP at the cup rim and uniform cAR1-GFP concentration. (E) Shows representative images of cells expressing RGBARG-GFP with the domains indicated deleted, as well as the R1792K point mutation that inactivates RasGAP activity. The averaged intensity of each construct across the cup is shown in (F), with the profile of the full-length protein from (D) in red for comparison. Values plotted are the mean  $\pm$  standard deviation. (G) The enrichment at the protruding rim of each construct measured by averaging the first 10% of each individual linescan and calculating the mean and SEM across each group. (H) The ability of each construct to rescue large macropinosome formation in RGBARG<sup>-</sup> cells was determined by measuring the size of nascent FITC dextran-containing macropinosomes by confocal microscopy, as in Figure 2A. >100 macropinosomes over 3 independent experiments were measured. Bars denote mean macropinosome volume  $\pm$  SEM, \*\* P<0.01, \*\*\* P<0.005 Mann-Whitney T-test.

1

2 To confirm the role of the RasGAP interactions in restricting RGBARG  
3 localisation, we also made a point mutant in the conserved arginine responsible  
4 for stabilising the transition from Ras-GTP to Ras-GDP (Bos et al., 2007). This  
5 mutation (R1792K) is predicted to disrupt GAP activity but still allow Ras  
6 binding and completely rescued RGBARG exclusion from the cup interior, and  
7 slightly but significantly increased enrichment at the cup tip (Figure 4F-G and  
8 supplement 2B). However, despite localising to the protruding rim,  
9 RGBARG<sub>R1792K</sub>-GFP did not rescue the cup organisation of *RGBARG*<sup>-</sup> cells, which  
10 still produced enlarged PIP<sub>3</sub> patches and small macropinosomes (Figure 4H and  
11 Supplement 2). RGBARG is therefore an active RasGAP and this domain also  
12 provides spatial information to position RGBARG to the periphery of the active  
13 Ras/PIP<sub>3</sub> patch where it can prevent its expansion and shape the forming cup.

14

15 The data above show that RGBARG integrates spatial cues from its RhoGEF, BAR  
16 and RasGAP domains for correct positioning and cup organisation. To identify  
17 the relevant binding partners and contribution of each domain, we also  
18 expressed them individually fused to GFP. Whilst RhoGEF-GFP expressed too  
19 poorly to observe its localisation, both the RCC1 and GAP domains were  
20 completely cytosolic (Figure 5A and C). In contrast, the BAR domain alone was  
21 sufficient for strong recruitment throughout the plasma membrane (Figure 5B).  
22 This was blocked by including either of the adjacent RhoGEF or RasGAP domains  
23 (Figure 5D and E), suggesting that BAR-domain binding may also be regulated by  
24 intramolecular interactions. In contradiction of our initial hypothesis however,  
25 BAR-GFP was not enriched at areas of curvature or protrusion. The BAR domain  
26 therefore appears to drive general recruitment to the plasma membrane rather  
27 than recognising curvature at cups.

28

29 As the BAR domain of RGBARG does not concentrate at specific membrane  
30 shapes, we investigated its lipid binding specificity by lipid-protein overlay.  
31 Incubation of lysates from cells expressing BAR-GFP with PIP strips indicated  
32 binding to all PIPs with two or more phosphates (Figure 5F). This was confirmed  
33 by PIP array, indicating a slight selectivity for PI(3,4)P<sub>2</sub> (Figure 5 Supplement

1 1A). Given this broad ability to bind all highly phosphorylated phosphoinositides  
2 it is likely that this BAR domain generally recognises their high negative charge  
3 rather than specific phosphate configurations. This supports a mechanism  
4 whereby highly-phosphorylated PIPs recruit RGBARG to the plasma membrane  
5 via its BAR domain where additional interactions with the RhoGEF and RasGAP  
6 domains further restrict its position and activity to the protruding edges of  
7 forming cups.

8

9 To identify the targets of the RhoGEF domain, we performed co-  
10 immunoprecipitations with a library of recombinant GST-tagged small GTPases.  
11 The *Dictyostelium* genome contains an expanded set of Rac small GTPases, but no  
12 Rho or CDC42 subfamily members (Vlahou and Rivero, 2006). Of these only RacH  
13 and RacG bound the RhoGEF domain of RGBARG with no detectable binding to  
14 other Racs, including Rac1 which has previously been implicated in cup  
15 formation (Dumontier et al., 2000).

16

17 Whilst RacH is involved primarily in endocytic trafficking and localises  
18 exclusively to intracellular compartments (Somesh et al., 2006a), RacG localises  
19 to the plasma membrane and is enriched at the protruding rim of phagocytic  
20 cups (Somesh et al., 2006b). Previous studies have also shown that  
21 overexpression of wild-type or constitutively active RacG also promotes  
22 phagocytosis, indicating a potential interaction with RGBARG (Somesh et al.,  
23 2006b).

24

25 Consistent with previous reports, we found loss of RacG had no significant effect  
26 on macropinocytosis, with mutants forming normal sized active Ras patches and  
27 macropinosomes (Somesh et al., 2006b)(Figure 5 supplement 1B and C). When  
28 we measured RGBARG-GFP recruitment, its association with cups was more  
29 uniform and was only enriched  $1.8 \pm 0.6$  fold at the rim in *RacG*- cells compared  
30 to  $2.6 \pm 0.7$  fold isogenic controls (Figure 5H-L). This indicates that RacG and  
31 RGBARG functionally interact *in vivo* and partly contribute to RGBARG  
32 localisation. However, the remaining signals or functional redundancy with other

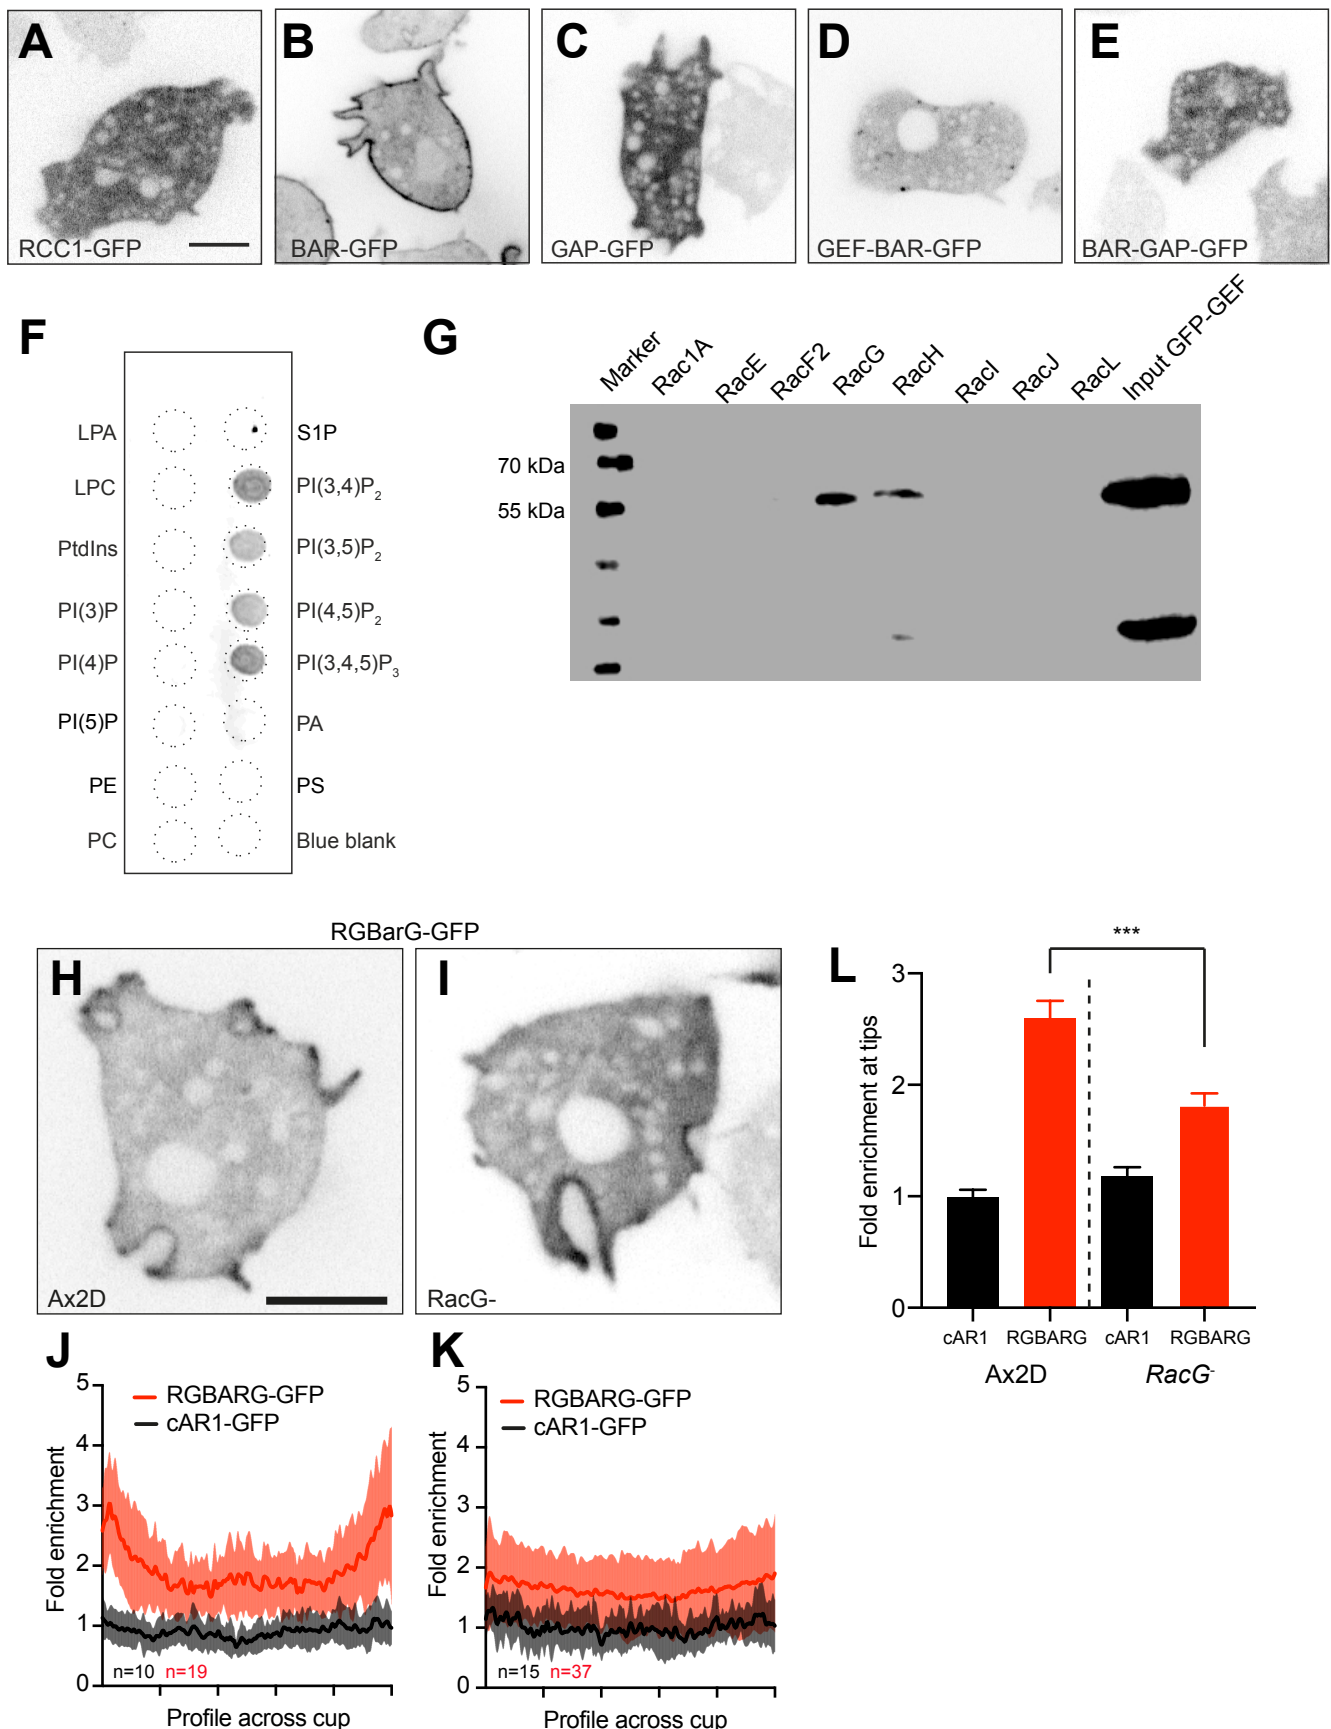

**Figure 5: Binding specificity of the BAR and GEF domains.** (A-E) Individual, or combinations of domains from RGBARG were expressed as GFP fusions in RGBARG- cells. Images shown are single confocal sections. (F) Lipid binding specificity of BAR-GEF by lipid overlay assay using whole cell lysate from BAR-GFP expressing cells. (G) Rac binding specificity of the RhoGEF domain determined by co-immunoprecipitation of GEF-GFP by a library of purified GST-Rac's bound to beads. (H) and (I) Confocal images of full-length RGBARG-GFP localisation in RacG- cells and their parental background strain Ax2D. The average profile ( $\pm$  standard deviation) of RGBARG-GFP along the cup relative to Ax2D and RacG- cells relative to cAR1-GFP is shown in (J) and (K) respectively. (L) Enrichment of RGBARG-GFP and cAR1 at the cup tip in each cell line. Bars indicate mean  $\pm$  SEM, \*\*\*  $P < 0.005$  Mann-Whitney T-test. All scale bars indicate 5  $\mu$ m.

1 Rac is sufficient for partial RGBARG recruitment and apparently normal  
2 engulfment in the absence of RacG.

3

4 Combined, our data indicate that RGBARG uses a coincidence detection  
5 recruitment mechanism to direct cup formation: BAR domain binding to  
6 negatively charged phospholipids directs the protein to the plasma membrane  
7 whilst additional interactions with RacG and active Ras synergise to constrain  
8 RGBARG to the cup rim. This tripartite regulation ensures that RGBARG is  
9 accurately positioned to exert its RhoGEF and RasGAP activities at the interface  
10 between cup interior and protrusion and organise engulfment.

11

## 12 **RGBARG is a highly active dual specificity Ras/Rap GAP**

13

14 Forming a complex 3-dimensional shape is likely to require multiple regulators  
15 and RGBARG is not the only RasGAP involved in macropinocytosis in  
16 *Dictyostelium*. Axenic strains (including the Ax2 parental strain used in this  
17 work) also harbour mutations in *NF1* that enhance fluid uptake via enlarged  
18 active Ras patches and subsequent formation of larger macropinosomes  
19 (Bloomfield et al., 2015). However, whilst mutations in *NF1* were reported in  
20 each of 10 independently isolated axenic strains, RGBARG mutations were  
21 completely absent ((Bloomfield et al., 2015) and G. Bloomfield, personal  
22 communication, May 2019). Our attempts to generate *RGBARG* mutants in non-  
23 axenic strains were also unsuccessful. This indicates that disruption of *NF1* but  
24 not *RGBARG* is sufficient to support axenic growth, and that they serve different  
25 functions.

26

27 To better understand the differences between *NF1* and RGBARG, we compared  
28 the specificity and activities of their RasGAP domains. The *Dictyostelium* genome  
29 encodes 14 Ras subfamily members of which RasB, RasG and RasS are the most  
30 important for macropinocytosis (Chubb et al., 2000; Hoeller et al., 2013;  
31 Junemann et al., 2016; Khosla et al., 2000). Overexpression of RasD can also  
32 partially compensate for loss of RasG and S (Khosla et al., 2000). The small  
33 GTPase Rap, a close relative of Ras, has also been implicated in macropinosome

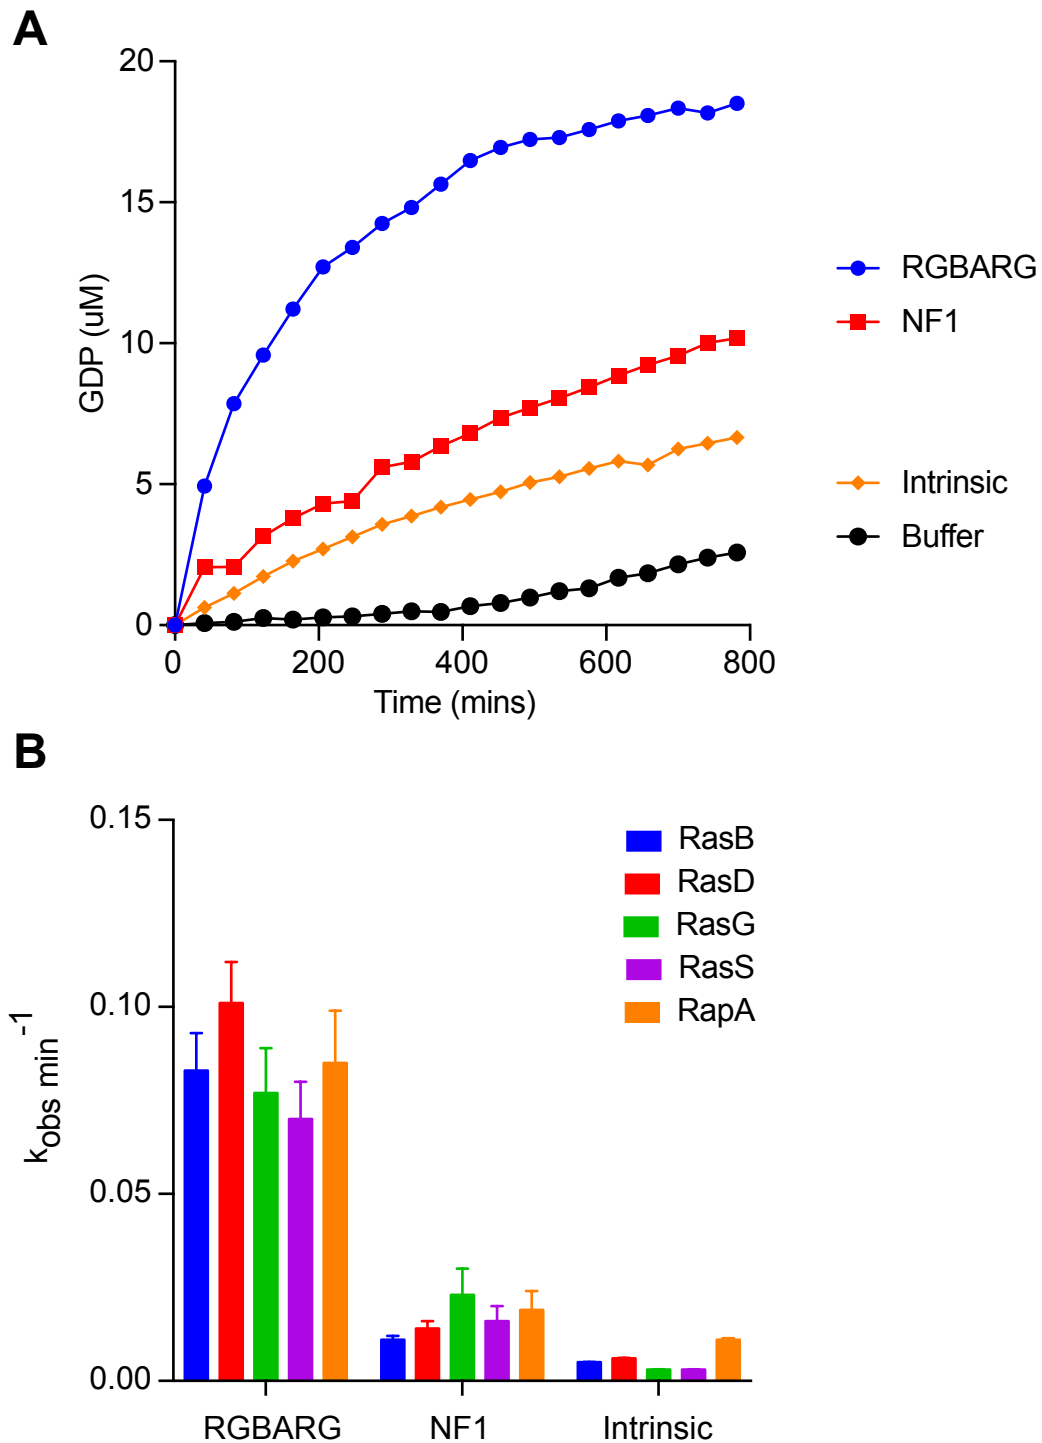

**Figure 6: RasGAP activity of RGBARG and NF1.** (A) Stimulation of GDP released from GTP-loaded RasG upon addition of recombinant RasGAP domains from either RGBARG or NF1, compared to the intrinsic GAP activity of the GTPase or GTP in buffer. (B) GAP activity of NF1 and RGBARG against a library of Ras superfamily members. Average of 3 independent experiments performed as in (A) in parallel. Bars indicate mean  $\pm$  standard deviation.



1 formation (Inaba et al., 2017). We therefore measured the specific GAP activity  
2 from both NF1 and RGBARG against each small GTPase.

3

4 Consistent with the inability of RGBARG<sub>R1792K</sub> to rescue the knockout phenotype, we  
5 found that the RasGAP domain of RGBARG was highly active against all the  
6 GTPases tested (Figure 6). The RasGAP domain of NF1 was also active against each  
7 Ras tested, but with 75% less activity than RGBARG in each case. RGBARG is  
8 therefore a more potent RasGAP *in vitro*, but the lack of specificity for particular Ras  
9 isoforms for both RGBARG and NF1 indicates their functional differences are likely  
10 imparted by additional factors such as their cellular localisation and dynamics.

11

## 12 **Loss of RGBARG improves phagocytosis of large objects**

13

14 The data above demonstrate that RGBARG is important during the spontaneous  
15 self-organisation of macropinocytic cups. As RGBARG also localises to  
16 phagocytic cups and engulfment of solid particles such as microbes uses much of  
17 the same machinery, we also investigated how RGBARG contributes to  
18 phagocytosis.

19

20 Disruption of NF1 has previously been shown to increase the size of particles  
21 that *Dictyostelium* can engulf (Bloomfield et al., 2015). As RGBARG also affects  
22 the size of the PIP<sub>3</sub> domains that define the cup interior we first tested the ability  
23 of RGBARG<sup>-</sup> cells to phagocytose different sized beads. Whilst disruption of  
24 RGBARG had no effect on phagocytosis of 1 µm diameter beads, engulfment of 4.5  
25 µm beads was enhanced 3-fold, with an average of 2.2±0.4 beads engulfed per  
26 cell after 1 hour, compared to 1.0±0.4 in control (Figure 7A and B). Enhanced Ras  
27 activation therefore appears to be generally beneficial for the engulfment of  
28 large spherical targets.

29

30 Surprisingly, although expression of RGBARG-GFP from an extrachromosomal  
31 vector fully rescued macropinosome formation (Figure 2A-C), this reduced the  
32 ability of RGBARG<sup>-</sup> cells to engulf 4.5 µm beads to 63% of control levels (Figure  
33 7B). This effect was even more severe upon expression of domain deletion

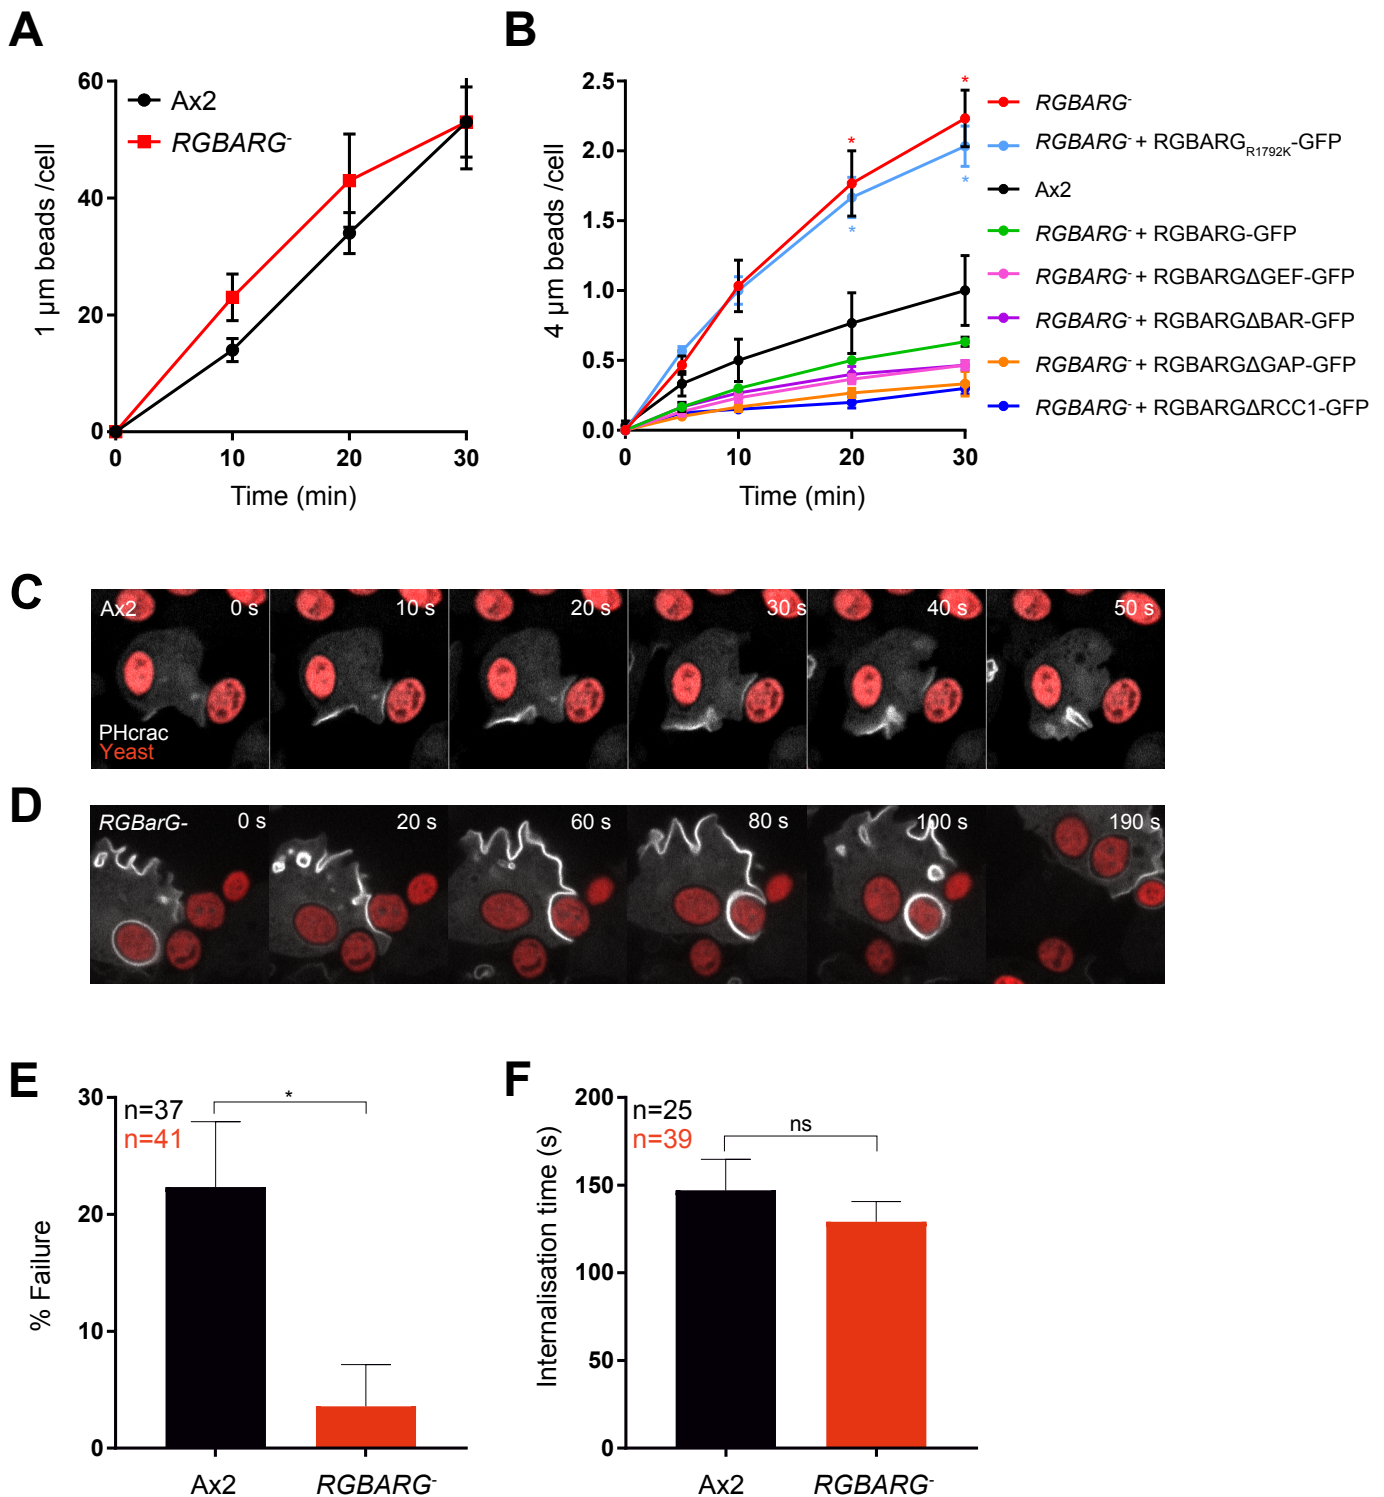

**Figure 7: Phagocytic defects in RGBARG<sup>-</sup> cells.** (A) Ax2 and RGBARG<sup>-</sup> cell have comparable rates of phagocytosis of fluorescent 1 μm beads. (B) Phagocytosis of 4 μm beads by Ax2 cells, RGBARG<sup>-</sup> cells, or RGBARG<sup>-</sup> cells expressing full-length or mutant RGBARG-GFP. Phagocytosis measured by flow cytometry in 3 independent experiments. Phagocytosis of TRITC-labelled yeast was directly observed by spinning disc confocal microscopy by either (C) Ax2 or (D) RGBARG<sup>-</sup> cells expressing PHCRAC-GFP. (C) Shows an example of a failed engulfment. (E) The relative frequency of phagocytosis failure after cup formation (indicated by PHCRAC-GFP recruitment). The time from initial contact to complete engulfment in successful phagocytic events is shown in (F). n indicates total number of phagocytic events over 3 independent experiments. All values plotted are mean ± standard deviation. \* P<0.01 Students T-test.



1 mutants including the  $\Delta$ BAR,  $\Delta$ GEF and  $\Delta$ GAP constructs which do not localise  
2 properly and have no deleterious effect on macropinosome formation. This  
3 indicates a dominant negative effect, most likely due to sequestration of binding  
4 partners. In contrast, expression of RGBARG<sub>R1792K</sub> had no inhibitory effect on  
5 RGBARG<sup>-</sup> cells. This only differs from RGBARG-GFP in its RasGAP activity  
6 indicating that mislocalisation or overexpression of this domain is sufficient to  
7 inhibit engulfment of large targets.

8

9 To better understand how loss of RGBARG affects phagocytosis we performed  
10 time-lapse microscopy of cells expressing PH<sub>CRAC</sub>-GFP engulfing TRITC-labeled  
11 yeast. Engulfment occurred rapidly in both cell types but failed at a frequency of  
12 ~20% in Ax2 cells with the PIP<sub>3</sub> patch dissipating and the yeast escaping from  
13 the cell (Video 6). Whilst the time for successful engulfment was no significantly  
14 altered by loss of RGBARG (129±11 minutes in mutants vs 147±18 minutes in  
15 Ax2), capture was much more robust with a failure rate of only 4±5 % compared  
16 to 22± 7% (Figure 7C-F and Video 7). The main influence on the phagocytic  
17 efficiency of large targets in RGBARG<sup>-</sup> cells thus appears to be increased cup  
18 stability and enlarged Ras signaling patch rather than rate of protrusion around  
19 the object.

20

## 21 **Spatial regulation of Ras by RGBARG is important for phagocytosis of** 22 **elongated targets**

23

24 To be effective, phagocytic cells must be able to engulf microbes with differing  
25 physical properties such as shape, size, stiffness and surface chemistry. As  
26 RGBARG is important for the organisation and stability of phagocytic and  
27 macropinosomocytic cups, we also investigated its role during the engulfment of  
28 different bacteria.

29

30 Phagocytosis was measured by the ability of *Dictyostelium* cells to reduce the  
31 turbidity of a bacterial suspension over time. Whilst disruption of RGBARG had  
32 no effect on the ability to clear a suspension of *Klebsiella aerogenes*, engulfment  
33 of *Escherichia coli* was substantially reduced (Figure 8A and B). This was fully

1 rescued by re-expression of RGBARG-GFP. Therefore, although loss of RGBARG  
2 has no effect on the engulfment of 1  $\mu\text{m}$  beads and is beneficial for the uptake of  
3 large beads and yeast, it causes a specific defect in engulfment of some bacteria.

4  
5 The most obvious physical difference between *K. aerogenes* and *E. coli* is their  
6 shape (Figure 8C and D). Both have similar short axes but *K. aerogenes* average  
7 3.2  $\mu\text{m}$  in length whilst *E. coli* have an average long axis of 5.4  $\mu\text{m}$ . Previous work  
8 investigating phagocytosis of different shaped beads by macrophages concluded  
9 that complex elongated shapes are more difficult to engulf (Champion and  
10 Mitragotri, 2006). We therefore hypothesised that the selective phagocytosis  
11 defects of *RGBARG*<sup>-</sup> cells was due to the target shape. To test this, we measured  
12 the ability of *RGBARG*<sup>-</sup> cells to engulf an additional elongated rod-shaped bacteria  
13 (GFP-expressing *Mycobacteria smegmatis*, 3-5  $\mu\text{m}$  long) by flow cytometry. The  
14 ability of *RGBARG*<sup>-</sup> cells to engulfing these bacteria was again reduced by 75%  
15 (Figure 8E), again correlating with an inability to phagocytose elongated targets.

16  
17 The data above are consistent with a role for RGBARG in enabling the engulfment  
18 of elongated bacteria. However, the bacterial strains used will also differ in other  
19 aspects such as their surface components, phagocytic receptor activation and  
20 stiffness. To directly test the importance of RGBARG in engulfing targets of  
21 different shape we therefore stretched 3  $\mu\text{m}$  latex beads to generate oblate  
22 ellipsoids of conserved volume and surface chemistry (Ho et al., 1993).

23  
24 To measure relative phagocytosis in the same experiment, cells were incubated  
25 with a 1:1 mix of spherical and stretched beads (2.6x aspect ratio) and the  
26 number of engulfed beads of each shape quantified by microscopy. The ability of  
27 Ax2 cells to engulf ellipsoid particles was reduced by 30% compared to spheres  
28 ( $P < 0.01$ , T-test). However, whilst *RGBARG*<sup>-</sup> cells engulfed the spheres with similar  
29 efficiency, the number of stretched beads taken up was reduced by over 70%  
30 (Figure 8C,  $P < 0.01$ , T-test). These effects were again rescued by re-expression of  
31 RGBARG-GFP, but not *RGBARG*<sub>R1792K</sub>-GFP demonstrating a key role for the  
32 RasGAP activity in mediating phagocytosis of elongated particles.

33

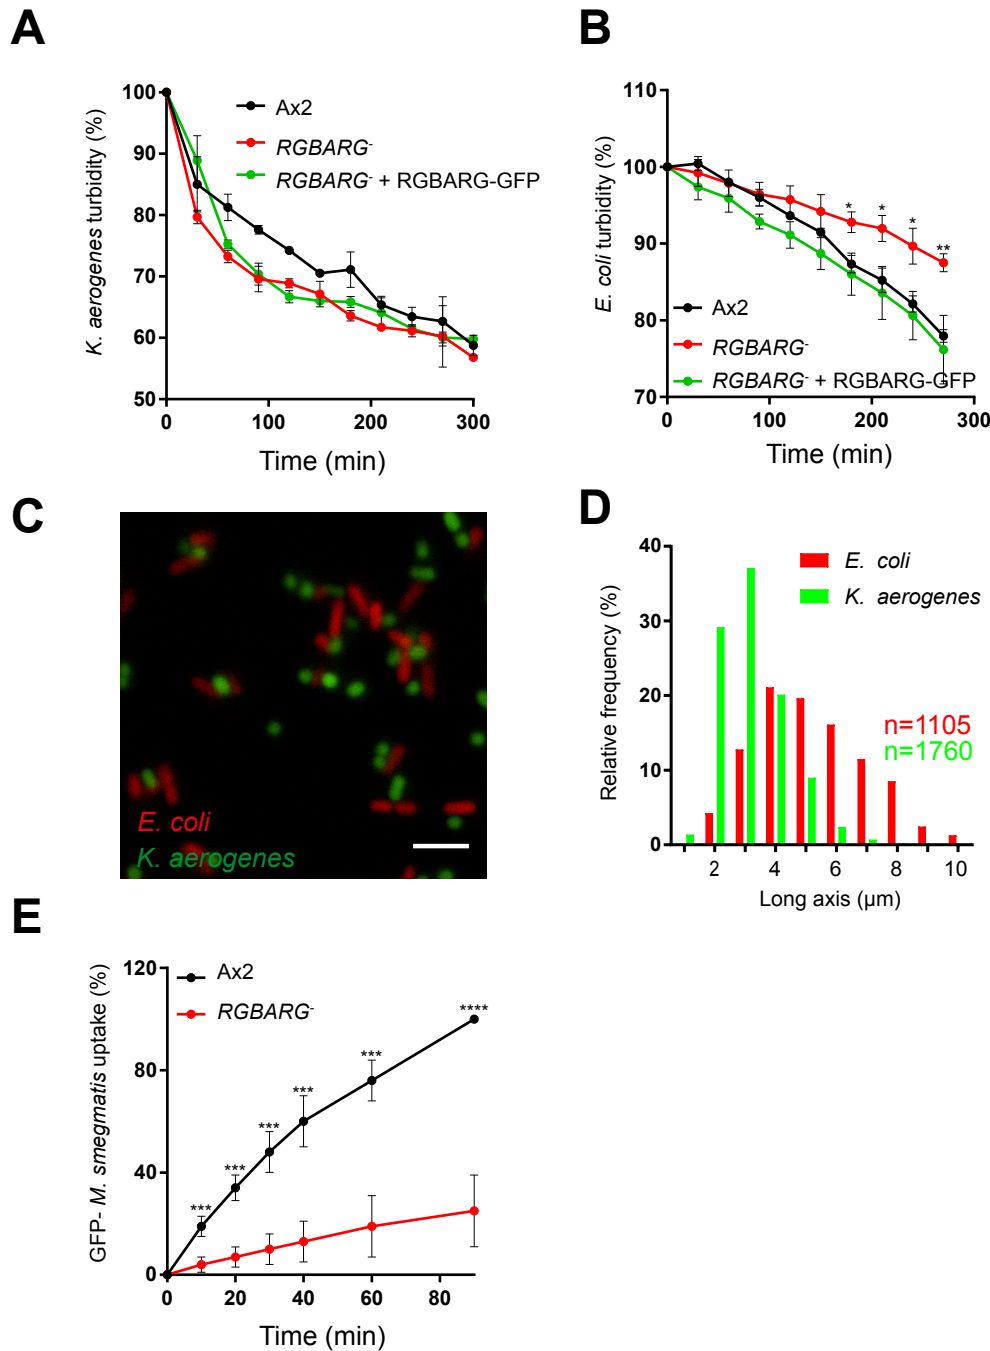

**Figure 8: RGBARG<sup>-</sup> cells have selective defects in phagocytosis of bacteria.** Phagocytosis of (A) *K. aerogenes* or (B) *E. coli* was measured by monitoring the decreasing turbidity of a bacterial suspension after addition of *Dictyostelium*. (C) show wide-field fluorescence microscopy images of GFP-expressing *K. aerogenes* mixed with RFP-expressing *E. coli*, demonstrating their different shape and size. The length of each bacteria was quantified automatically and is plotted in (D). (E) Phagocytosis of GFP-*M. smegmatis*, an alternative elongated bacteria, measured by flow cytometry. Values plotted in (A), (B) and (E) are mean  $\pm$  standard deviation of 3 independent experiments. \*P<0.05, \*\*P<0.01, \*\*\*P<0.005, Student's T-test.

1 How phagocytic cups organise and adapt their cytoskeleton to engulf targets of  
2 differing geometry is very poorly understood. Our data demonstrate that in  
3 *Dictyostelium*, a tripartite recruitment mechanism operates to precisely position  
4 a RasGAP and RhoGEF domain-containing protein at the interface between the  
5 protrusive rim and static interior domains of phagocytic and macropinocytic  
6 cups. We propose a model whereby this organises the cup by regulating the  
7 balance between protrusion and expansion of the interior in order to both  
8 efficiently form macropinosomes and facilitate engulfment of geometrically  
9 diverse targets.

## 1 **Discussion**

2

3 In this study we have identified a new component and mechanism used by cells  
4 to organise their protrusions into the 3-dimensional cup shapes required to  
5 engulf extracellular fluid or particles. Consistent with previous studies, our data  
6 support a model whereby cup formation is guided by the formation of a  
7 protrusive rim encircling a static interior domain (Veltman et al., 2016). We  
8 show that in *Dictyostelium*, RGBARG provides a direct link between the Ras and  
9 Rac activities that underlie these different functional domains, providing a novel  
10 mechanism to co-ordinate cup organisation in space and time.

11

12 RGBARG is not the only RasGAP in *Dictyostelium* involved in macropinosome  
13 formation. However, it is the only RasGAP in the *Dictyostelium* genome to also  
14 possess a RhoGEF domain. RGBARG is therefore unique in its ability to  
15 integrate the activities of both GTPase families. There are no human proteins  
16 with an identical domain structure to RGBARG, and whilst most classical  
17 RasGAPs are found in multidomain proteins, none also contain a classical  
18 RhoGEF domain (Bos et al., 2007). A screen for RhoGAPs involved in phagosome  
19 formation in macrophages identified 3 proteins (ARHGAP12, ARHGAP25 and  
20 SH3BP1), but although they all contain PIP<sub>3</sub> binding (PH) or BAR domains, none  
21 contain domains that link to other GTPase families (Schlam et al., 2015). The  
22 oncogene TIAM1 contains both RhoGEF and Ras-binding domains however, and  
23 BAR domains are found in conjunction with GAP or GEFs in several other  
24 proteins. Therefore whilst mammalian cells also need to coordinate Ras and Rac  
25 activity during cup formation, this is likely achieved via multiple proteins,  
26 potentially in a complex.

27

28 Multiple GAP's and GEF's collaborate to shape protrusions into cups. This is  
29 apparent in the different roles played by RGBARG and NF1. Both are important  
30 negative regulators of Ras, but whilst RGBARG is specifically enriched at the cup  
31 rim, NF1 appears to be present throughout the cup (Bloomfield et al., 2015).  
32 RGBARG and NF1 therefore play different functional roles; whilst disruption of

1 NF1 leads to an increase in the volume of fluid taken up and can facilitate axenic  
2 growth (Bloomfield et al., 2015), RGBARG appears more important for cup  
3 structure and shape. We therefore speculate a model whereby NF1 acts to  
4 generally suppress Ras activity and regulate the spontaneous excitability of  
5 active Ras patches, whilst RGBARG operates at their periphery to restrict their  
6 expansion and stimulate protrusion via Rac.

7  
8 This model is doubtless overly simplistic, and other RasGAP's also contribute to  
9 shaping active Ras dynamics. For example, the IQGAP-related protein IqgC was  
10 also recently shown to have RasGAP activity and localise throughout the interior  
11 of macropinocytic and phagocytic cups in *Dictyostelium* (Marinovic et al., 2019).  
12 In contrast to our findings with NF1 and RGBARG however, IqgC is reported to  
13 have specific RasGAP activity against RasG. As the different Ras isoforms are  
14 non-redundant (Khosla et al., 2000), IqgC adds a further layer of regulatory  
15 complexity shaping the dynamics of engulfment.

16  
17 Whilst the regulation of Ras signaling and the static interior domain is becoming  
18 clearer, how protrusion is regulated during engulfment is less well understood.  
19 In mammalian cells, several studies indicate that actin dynamics and protrusion  
20 at the cup is regulated by the combined activities of Rac1 and CDC42 (Cox et al.,  
21 1997; Massol et al., 1998; Schlam et al., 2015). Rac1 and CDC42 are differentially  
22 activated with active Rac1 throughout the cup and CDC42 activation earlier and  
23 more restricted to the rim (Hoppe and Swanson, 2004). Whilst *Dictyostelium*  
24 does not possess a clear CDC42 orthologue, we find that RGBARG specifically  
25 interacts with the atypical Rac isoforms RacG and RacH. Currently, no direct  
26 effectors of either protein are known, and RacG does not interact with the Rac-  
27 binding domain of PAK commonly used as a probe for active Rac1 (Somesh et al.,  
28 2006b). RacG therefore has at least partly distinct effectors to Rac1. Nonetheless,  
29 in cell-free assays, RacG is able to induce actin polymerisation via the ARP2/3  
30 complex, although whether this is dependent on SCAR/WAVE or other WASP  
31 family members is not known (Somesh et al., 2006b). RacG therefore appears to

1 be at least partly responsible for defining the protrusive rim, possibly through  
2 some coincidence-detection mechanism with active Rac1.

3

4 Whilst RacG has no clear direct orthologue in mammalian cells, it is most similar  
5 to Cdc42 in protein sequence. Whilst constitutively active Rac1 induces the  
6 formation of lamellipodial-type protrusions (Dumontier et al., 2000),  
7 constitutively active RacG and Cdc42 both induce filopodia (Nobes and Hall,  
8 1995; Somesh et al., 2006b). We therefore speculate that RacG and Cdc42 are  
9 functional orthologues, and the mechanism by which these small GTPases  
10 integrate with active Ras to restrict the localisation of RhoGEF and RasGAP  
11 proteins such as RGBARG is a general device used to define the protrusive cup  
12 rim.

13

14 The involvement of both RacG/Cdc42 and Rac1 family GTPases indicates a  
15 complex relationship between filopodial and lamellipodial type protrusions  
16 during cup formation. Whilst most studies in *Dictyostelium*, RAW macrophages,  
17 dendritic cells and cancer cell lines describe macropinosome formation from  
18 smooth, sheet-like projections or cups (Swanson, 2008; Veltman et al., 2016;  
19 West et al., 2000; Williamson and Donaldson, 2019), it was recently shown that  
20 RAW macrophages can also form macropinosomes by a more filopodial “tent-  
21 pole”-type mechanism where protrusion is driven by actin-rich spikes (Condon  
22 et al., 2018). Whether this is a general mechanism, or represents a shift in the  
23 balance of filopodial vs lamellipodial regulatory proteins in these cells is unclear.  
24 However it is probable that filopodial and lamellal cup formation are non-  
25 exclusive extremes of a continuum - much as they are during cell migration.

26

27 The multi-layered regulation of small GTPases is particularly important when  
28 cells are challenged to engulf particles or microbes of different shapes. This is  
29 critical for amoebae to feed on diverse bacteria or immune cells to be able to  
30 capture and kill a wide range of pathogens, but how cells adapt to different target  
31 geometries is very poorly understood (Champion and Mitragotri, 2006;  
32 Champion and Mitragotri, 2009). To our knowledge, *RGBARG*- cells are the first  
33 mutants described with a geometry-specific defect in phagocytosis, underlining

1 the importance of co-ordinating and balancing Ras and Rac activities. This again  
2 differs from the role of NF1, as the *NF1*-deficient Ax2 strain used in this study is  
3 able to efficiently engulf and grow on a wide range of bacteria including  
4 elongated strains such as *E. coli* (Buckley et al., 2019). It is still not known how  
5 other regulatory elements or cytoskeletal components adapt to differing shapes,  
6 but it seems likely that large-scale rearrangements are necessary to  
7 accommodate different targets.

8

9 In summary, we describe a mechanism to co-ordinate the activity of Rac and Ras  
10 family GTPases during engulfment in *Dictyostelium*. The proteins that mediate  
11 this co-ordination in mammalian cells remain unknown. However, we propose a  
12 general model by which spatial signals and effectors from multiple small  
13 GTPases integrate to shape the protrusions that form macropinocytic and  
14 phagocytic cups, enabling cells to engulf diverse targets.



## 1 **Methods**

### 2 **Dictyostelium culture and molecular biology**

3 Unless otherwise stated, *Dictyostelium* strains were derived from the MRC-Ax2  
4 axenic strain provided by the Kay laboratory and were routinely cultured in filter  
5 sterilised HL-5 medium (Formedium) at 22°C. RacG mutants and corresponding  
6 parental strain (from the Devreotes group, Johns Hopkins, Ax2D) were kind gifts  
7 from Francisco Rivero (University of Hull)(Somesh et al., 2006b). Growth rates  
8 were measured by seeding cells at  $0.5 \times 10^5$ /ml in HL-5 and counting cell number  
9 twice daily for three days. Growth rate was then calculated by fitting an  
10 exponential growth curve using Graphpad Prism software. Cells were  
11 transformed by electroporation:  $6 \times 10^6$  cells were resuspended in 0.4 mls of ice  
12 cold E-buffer (10 mM  $\text{KH}_2\text{PO}_4$  pH 6.1, 50 mM sucrose) and transferred to 2 mm  
13 electroporation cuvette containing DNA (0.5  $\mu\text{g}$  for extrachromosomal plasmids,  
14 15  $\mu\text{g}$  for knockout vectors). Cells were then electroporated at 1.2 kV and 3  $\mu\text{F}$   
15 capacitance with a 5  $\Omega$  resistor in series using a Bio-Rad Gene Pulser II. After 24  
16 hours transformants were selected in either 20  $\mu\text{g}/\text{ml}$  hygromycin (Invitrogen),  
17 10  $\mu\text{g}/\text{ml}$  G418 (Sigma) or 10  $\mu\text{g}/\text{ml}$  blasticidin (Melford).

18  
19 BAR domain contain proteins were identified by multiple BLAST searches using  
20 Dictybase ([www.dictybase.org](http://www.dictybase.org)) (Fey et al., 2013). Coding sequences were then  
21 amplified by PCR from vegetative Ax2 cDNA adding compatible restriction sites  
22 for subcloning into the BglII/SpeI sites of the N- and C- terminal GFP-fusion  
23 *Dictyostelium* extrachromosomal expression vectors pDM1043 and pDM1045  
24 (non-axenically selectable versions of the pDM modular expression system  
25 (Veltman et al., 2009)). Truncation and point mutants of RGBARG were also  
26 generated by PCR and expressed using pDM1045. The *RGBARG* (DDB\_G0269934)  
27 knockout construct was generated by PCR fusion of ~1Kb 5' and 3'  
28 recombination arms with the floxed blasticidin selection cassette from  
29 pDM1079, as described in detail in (Paschke et al., 2018). After transformation,  
30 independent clones were obtain by dilute plating in 96 well plates. Disruption of  
31 the RGBARG locus was screened by PCR from genomic DNA isolated from  $1 \times 10^6$   
32 cells lysed in 100  $\mu\text{l}$  10mM Tris- HCl pH8.0, 50 mM KCl, 2.5mM  $\text{MgCl}_1$ , 0.45%  
33 NP40, 0.45% Tween 20 and 0.4 mg/ml Proteinase K (NEB). After 5 minutes

1 incubation at room temperature, the proteinase K was denatured at 95°C for 10  
2 minutes prior to PCR analysis. The Ras binding domain (RBD) of PAK1-GFP  
3 construct used as an active Ras reporter was a gift from Gareth Bloomfield.

4

#### 5 **Macropinocytosis assays**

6 To measure bulk fluid uptake 2mg/ml FITC-dextran (70kDa; Sigma) was added  
7 to cells at  $5 \times 10^6$ /ml in shaking culture. At each timepoint, 500µl of cells were  
8 removed and added to 1ml ice-cold KK2 (16.5mM  $\text{KH}_2\text{PO}_4$ , 3.8mM  $\text{K}_2\text{HPO}_4$ ,  
9 pH6.1). Cells were then pelleted at 7,000  $\times g$  for 30 seconds, washed once in KK2  
10 and frozen. Pellet were then lysed in 200µl 50mM  $\text{Na}_2\text{PO}_4$  pH9.3, 0.2% Triton  
11 X100) and fluorescence measured on a plate reader at 485 excitation/520nm  
12 emission. Fluorescence was then normalised to total protein in an additional  
13 sample and calculated as a percentage of wild-type cells at 90 minutes.

14

15 Macropinosome volume was measured by incubating cells for 5 minutes in  
16 0.1µg/ml FITC-dextran and obtaining Z-stacks on a spinning disc confocal  
17 microscope. FITC is pH-sensitive and the sensitivity was set so only new non-  
18 acidified macropinosomes were visible. For analysis, individual cells were  
19 cropped out, randomised, and volume calculated from manually measuring the  
20 maximum diameter of each macropinosome in each cell, assuming they were  
21 spherical.

22

#### 23 **Phagocytosis assays**

24 Phagocytosis of fluorescent beads was measured by flow cytometry as  
25 previously described in detail (Sattler et al., 2013). Briefly, 1 or 4.5 µm diameter  
26 YG-carboxylated polystyrene beads (Polysciences Inc) were shaken with  $2 \times 10^6$   
27 *Dictyostelium* /ml at ratios of 200:1 and 10:1 respectively. 500 µl samples were  
28 removed at each timepoint and added to 3 ml ice-cold Sorenson sorbitol buffer  
29 (SSB; 15 mM  $\text{KH}_2\text{PO}_4$ , 2 mM  $\text{Na}_2\text{HPO}_4$ , 120 mM Sorbitol) containing 5mM sodium  
30 azide. Samples were then centrifuged at 100  $\times g$  for 10 minutes, pellets  
31 resuspended in SSB and analysed on an Attune NxT flow cytometer (Life  
32 Technologies). Analysis was performed using FloJo software as described  
33 (Sattler et al., 2013).

1

2 To measure uptake of GFP-expressing *M. smegmatis* by flow cytometry, the  
3 bacteria were grown to an OD<sub>600</sub> of 1, pelleted by centrifugation at 10,625 x g for  
4 4 minutes and resuspended in 1ml HL5 medium. Bacteria clumps were then  
5 disrupted by passing through a 26-gauge needle several times, before adding a  
6 1/10th volume of bacteria to a *Dictyostelium* culture and processing as above.

7

8 To measure phagocytosis of bacteria by decreasing turbidity, an overnight  
9 bacterial culture in LB was diluted 1:25 and grown at 37°C until an OD<sub>600</sub> of 0.7  
10 before pelleting and resuspension in SSB at an OD<sub>600</sub> of 0.8. This was then added  
11 to an equal volume of *Dictyostelium* at 2 x 10<sup>7</sup> cells/ml in SSB at room  
12 temperature and shaken in flasks. The OD<sub>600</sub> was then measured over time.

13

14 Phagocytosis and TRITC labeling of heat killed *S. cerevisiae* was performed  
15 essentially as previously described (Rivero and Maniak, 2006). *Dictyostelium* at  
16 1 x 10<sup>6</sup> cells/ml in HL5 were seeded in glass-bottomed microscopy dishes (Mat-  
17 tek) and left for 1 hour prior to addition of a 5-fold excess of yeast. After 30  
18 minutes, the fluorescence of extracellular yeast was quenched by addition of 0.2  
19 mg/ml trypan blue and images of multiple fields of view taken on a wide-field  
20 microscope scoring >100 cells per condition.

21

## 22 **Microscopy and image analysis**

23 Live cell imaging was performed in glass-bottomed microscopy dishes (Mat-Tek)  
24 with cells seeded the preceding day in filtered HL-5 medium, unless otherwise  
25 stated. Spinning disc images were captured using a Perkin-Elmer Ultraview VoX  
26 spinning disk microscope with a UplanSApo 60x oil immersion objective (NA 1.4)  
27 and Hammamatsu C9100-50-EM0CCD camera. Laser scanning confocal images  
28 were obtained using a Zeiss LSM880 Airyscan confocal equipped with a Fastscan  
29 detector, and a 63x 1.4 NA objective. Images were acquired in fastscan mode and  
30 deconvolved by airyprocessing using Zen black software (Zeiss).

31

32 Image analysis was performed using ImageJ (<https://imagej.nih.gov>) with  
33 average plots of protein enrichment across cups generated using a custom script

1 in Igor Pro (Wavemetrics). For this, confocal images were captured and linescans  
2 of GFP-fluorescence intensity measured from the protrusive tip to tip. The  
3 average signal from a 1-2  $\mu\text{m}$  non-protruding region of the cell was also  
4 measured as was the local background outside each cell. Local background was  
5 subtracted and signal across the cup divided by the non-protruding membrane  
6 signal to give fold-enrichment. To compare enrichment across multiple cups,  
7 normalised linescans were extrapolated over 1000 points and averaged.  
8 Enrichment at the cup tip was measured by the average of the first 100 points of  
9 the profile for each cup.

10

11 The bacterial long axis was measured automatically from widefield images of  
12 either GFP or RFP expressing bacteria in ImageJ. Individual bacteria were  
13 identified by thresholding and long axis measured using the Feret's diameter  
14 function.

15

## 16 **Western blotting and Lipid overlay assays**

17 Western blotting was performed by standard techniques, separating proteins by  
18 SDS-PAGE and probing using a custom rabbit polyclonal antibody to GFP (gift  
19 from Andrew Peden). Endogenously biotinylated proteins were used as a loading  
20 control, using Alexa680-labelled streptavidin (Life Technologies)(Davidson et al.,  
21 2013). Blots were imaged LiCor odyssey SA fluorescence gel imager.

22

23 For lipid overlay assays,  $1 \times 10^7$  Ax2 cells expressing the BAR domain fused to  
24 GFP (pCB114) were washed once in SSB, lysed in 600  $\mu\text{l}$  RIPA buffer (50mM  
25 TrisHCl pH7.5, 150mM NaCl, 0.1% SDS, 2mM EDTA, 0.5% sodium deoxycholate,  
26 1 x HALT protease inhibitors (Thermo Fisher), 0.5% Triton X100) and left on ice  
27 for 45 minutes. Insoluble material was then removed by centrifugation at 15,871  
28  $\times g$  for 20 minutes at 4°C. PIP strips or Arrays (Echelon Biosciences) were  
29 blocked in 3% fatty acid-free bovine serum albumin (BSA) in TBS-T (20mM Tris  
30 base, 150mM NaCl, 0.05% Tween20, pH7.2). Samples were then diluted in TBS-T  
31 and incubated with the strips for 1 hour at 22°C, before washing and processing  
32 as for Western blotting.

33

## 1 **GAP and GEF biochemistry**

2 Interactions with recombinant GST-Rac isoforms were performed as described  
3 previously (Plak et al., 2013). *Dictyostelium* cells expressing GST-Rac bait  
4 proteins and GFP-fused to the GEF domain of RGBARG were expressed and lysed  
5 in 2mls of buffer (10mM Na<sub>2</sub>HPO<sub>4</sub> pH7.2, 1% Triton X100, 10% glycerol, 150mM  
6 NaCl, 10mM MgCl<sub>2</sub>, 1mM EDTA, 1mM Na<sub>3</sub>VO<sub>4</sub>, 5mM NaF) including protease  
7 inhibitor cocktail (Roche). Lysates were mixed with glutathione sepharose beads  
8 (GE Healthcare) and incubated overnight at 4°C. Unbound proteins were washed  
9 away with PBS, and bound proteins detected by Western blot using an anti-GFP  
10 antibody (SC9996).

11  
12 For GAP activity measurements, His-NF1 GAP domain (AA 2530-3158) and MBP-  
13 His-RGBAR GAP domain (AA 1717-2045) were produced and isolated from *E.*  
14 *coli* Rosetta cells. His-NF1 GAP was purified using a HisTrap excel - affinity  
15 column (GE Healthcare) and eluted in buffer containing 50mM Tris, 50mM NaCl,  
16 5% Glycerol, 3mM β-mercaptoethanol and 200mM imidazole, pH7.5. MBP-His-  
17 RGBAR GAP, was purified by Maltose Binding Protein Trap (MBPTrap) - affinity  
18 column (GE Healthcare) and eluted in 20mM Tris, 200mM NaCl, 5% Glycerol  
19 1mM β-Mercaptoethanol and 10mM Maltose, pH7.5. Proteins were further  
20 purified by size exclusion chromatography (Sephacryl 16/60, GE Healthcare) and  
21 stored in 50mM Tris, 50mM NaCl, 5mM DTT, and 5mM MgCl<sub>2</sub>, pH7,5.1.

22  
23 1μM of the indicated Ras proteins with and without equal amount of indicated  
24 GAP domain was incubated with 50 μM of GTP at 20°C in 50 mM Tris pH 7.5, 50  
25 mM NaCl and 5mM MgCl<sub>2</sub>. At each timepoint the GDP content of the samples was  
26 analysed by a HPLC (Thermo Ultimate 3000): a reversed phase C18 column was  
27 employed to detect GDP and GTP content (in %) as previously described (Eberth  
28 and Ahmadian, 2009). Linear rates of GDP production (first 4-8 timepoints) were  
29 calculated using GraFit 5.0 (Erithacus software).

30

## 31 **Ellipsoid beads generation and phagocytosis**

32 3μm unmodified non-fluorescent polystyrene beads (Polysciences Inc.) were  
33 embedded in polyvinyl alcohol (PVA) film (Sigma Aldrich) and stretched as

1 previously described (Ho et al., 1993). Briefly, 2.8 mls beads of bead solution  
2 were added to 20mls 25% w/w dissolved PVA solution and poured into a 10.5 x  
3 10.5 cm plastic mold to create a film. These were cut into 3 x 2cm strips, marked  
4 with a grid to follow deformation and placed in a custom stretching device as  
5 described in detail in (Ho et al., 1993). Films were the placed in a 145 °C oil bath  
6 to soften beads and film and slowly pulled to the desired length. After cooling  
7 below the glass transition T<sub>g</sub> temperature, the beads were extracted from the  
8 central region where the grid was deformed evenly. This part was cut into small  
9 pieces and rotated in 10 mls of a 3:7 mix of isopropanol:water overnight at 20°C  
10 to dissolve. Beads were aliquoted and twice heated at 75°C for 10 minutes and  
11 washed in isopropanol: water. Beads were then washed twice in  
12 isopropanol:water at 22 °C, before two washes in water. The amount of stretch  
13 was measured by imaging on an inverted microscope and manually measuring  
14 their length in ImageJ.

15

16 To measure phagocytosis, equal numbers of stretched and unstretched beads  
17 were mixed, sonicated and incubated at a 10-fold excess to cells at  $1 \times 10^6$  /ml,  
18 shaking in HL5. After 30 minutes, 500  $\mu$ l samples were added to 3 ml SSB with  
19 5mM sodium azide to detach unengulfed beads. Cells were washed in ice-cold  
20 SSB, transferred to a microscopy dish and allowed to adhere for 10 minutes  
21 before imaging and the number of each shape bead internalised quantified  
22 manually.

## 23 **Acknowledgements**

24 The authors would like to thank Francisco Rivero for providing the RacG mutant  
25 cell line and plasmids, Andrew Peden for the GFP antibody, Gareth Bloomfield  
26 and Rob Kay for NF1 and GFP-RBD constructs and Iwan Evans for the RFP-*E. coli*  
27 strain. JSK is supported by Royal Society University Research Fellowship  
28 UF140624. Microscopy studies were supported by UK Medical Research Council  
29 grant (G0700091) and Wellcome Trust grant (GR077544AIA).



## 1   References

2

- 3   Amyere, M., B. Payraastre, U. Krause, P. Van Der Smissen, A. Veithen, and P.J.  
4        Courtoy. 2000. Constitutive macropinocytosis in oncogene-transformed  
5        fibroblasts depends on sequential permanent activation of  
6        phosphoinositide 3-kinase and phospholipase C. *Mol Biol Cell*. 11:3453-  
7        3467.
- 8   Araki, N., Y. Egami, Y. Watanabe, and T. Hatae. 2007. Phosphoinositide  
9        metabolism during membrane ruffling and macropinosome formation in  
10       EGF-stimulated A431 cells. *Exp Cell Res*. 313:1496-1507.
- 11   Araki, N., M.T. Johnson, and J.A. Swanson. 1996. A role for phosphoinositide 3-  
12        kinase in the completion of macropinocytosis and phagocytosis by  
13        macrophages. *J Cell Biol*. 135:1249-1260.
- 14   Aspenstrom, P. 2014. BAR domain proteins regulate Rho GTPase signaling. *Small*  
15        *GTPases*. 5:7.
- 16   Bar-Sagi, D., and J.R. Feramisco. 1986. Induction of membrane ruffling and fluid-  
17        phase pinocytosis in quiescent fibroblasts by ras proteins. *Science*.  
18        233:1061-1068.
- 19   Bloomfield, G., and R.R. Kay. 2016. Uses and abuses of macropinocytosis. *J Cell*  
20        *Sci*. 129:2697-2705.
- 21   Bloomfield, G., D. Traynor, S.P. Sander, D.M. Veltman, J.A. Pachebat, and R.R. Kay.  
22        2015. Neurofibromin controls macropinocytosis and phagocytosis in  
23        Dictyostelium. *eLife*. 4.
- 24   Bos, J.L., H. Rehmann, and A. Wittinghofer. 2007. GEFs and GAPs: critical  
25        elements in the control of small G proteins. *Cell*. 129:865-877.
- 26   Buckley, C.M., and J.S. King. 2017. Drinking problems: Mechanisms of  
27        macropinosome formation and maturation. *The FEBS Journal*.
- 28   Buckley, C.M., Victoria L Heath, A. Gueho, C. Bosmani, P. Knobloch, P. Sikakana, N.  
29        Personnic, S.K. Dove, R.H. Michell, R. Meier, H. Hilbi, T. Soldati, R.H. Insall,  
30        and J.S. King. 2019. PIKfyve/Fab1 is required for efficient V-ATPase and  
31        hydrolase delivery to phagosomes, phagosomal killing, and restriction of  
32        Legionella infection. *PLoS pathogens*. *PLoS Pathogens*. In press.
- 33   Caron, E., and A. Hall. 1998. Identification of two distinct mechanisms of  
34        phagocytosis controlled by different Rho GTPases. *Science*. 282:1717-  
35        1721.
- 36   Champion, J.A., and S. Mitragotri. 2006. Role of target geometry in phagocytosis.  
37        *Proc Natl Acad Sci U S A*. 103:4930-4934.
- 38   Champion, J.A., and S. Mitragotri. 2009. Shape induced inhibition of phagocytosis  
39        of polymer particles. *Pharm Res*. 26:244-249.
- 40   Chubb, J.R., A. Wilkins, G.M. Thomas, and R.H. Insall. 2000. The Dictyostelium  
41        RasS protein is required for macropinocytosis, phagocytosis and the  
42        control of cell movement. *J Cell Sci*. 113 ( Pt 4):709-719.
- 43   Commisso, C., S.M. Davidson, R.G. Soydaner-Azeloglu, S.J. Parker, J.J. Kamphorst,  
44        S. Hackett, E. Grabocka, M. Nofal, J.A. Drebin, C.B. Thompson, J.D.  
45        Rabinowitz, C.M. Metallo, M.G. Vander Heiden, and D. Bar-Sagi. 2013.  
46        Macropinocytosis of protein is an amino acid supply route in Ras-  
47        transformed cells. *Nature*. 497:633-637.

- 1 Condon, N.D., J.M. Heddleston, T.L. Chew, L. Luo, P.S. McPherson, M.S. Ioannou, L.  
2 Hodgson, J.L. Stow, and A.A. Wall. 2018. Macropinosome formation by tent  
3 pole ruffling in macrophages. *J Cell Biol.*
- 4 Cox, D., P. Chang, Q. Zhang, P.G. Reddy, G.M. Bokoch, and S. Greenberg. 1997.  
5 Requirements for both Rac1 and Cdc42 in membrane ruffling and  
6 phagocytosis in leukocytes. *The Journal of experimental medicine.*  
7 186:1487-1494.
- 8 Cox, D., C.C. Tseng, G. Bjekic, and S. Greenberg. 1999. A requirement for  
9 phosphatidylinositol 3-kinase in pseudopod extension. *J Biol Chem.*  
10 274:1240-1247.
- 11 Davidson, A.J., J.S. King, and R.H. Insall. 2013. The use of streptavidin conjugates  
12 as immunoblot loading controls and mitochondrial markers for use with  
13 *Dictyostelium discoideum*. *Biotechniques.* 55:39-41.
- 14 Dawson, J.C., J.A. Legg, and L.M. Machesky. 2006. Bar domain proteins: a role in  
15 tubulation, scission and actin assembly in clathrin-mediated endocytosis.  
16 *Trends Cell Biol.* 16:493-498.
- 17 Dumontier, M., P. Hocht, U. Mintert, and J. Faix. 2000. Rac1 GTPases control  
18 filopodia formation, cell motility, endocytosis, cytokinesis and  
19 development in *Dictyostelium*. *J Cell Sci.* 113 ( Pt 12):2253-2265.
- 20 Eberth, A., and M.R. Ahmadian. 2009. In vitro GEF and GAP assays. *Curr Protoc*  
21 *Cell Biol.* Chapter 14:Unit 14 19.
- 22 Eden, S., R. Rohatgi, A.V. Podtelejnikov, M. Mann, and M.W. Kirschner. 2002.  
23 Mechanism of regulation of WAVE1-induced actin nucleation by Rac1 and  
24 Nck. *Nature.* 418:790-793.
- 25 Fey, P., R.J. Dodson, S. Basu, and R.L. Chisholm. 2013. One stop shop for  
26 everything *Dictyostelium*: dictyBase and the Dicty Stock Center in 2012.  
27 *Methods Mol Biol.* 983:59-92.
- 28 Fujii, M., K. Kawai, Y. Egami, and N. Araki. 2013. Dissecting the roles of Rac1  
29 activation and deactivation in macropinocytosis using microscopic photo-  
30 manipulation. *Scientific reports.* 3:2385.
- 31 Griffin, F.M., Jr., J.A. Griffin, J.E. Leider, and S.C. Silverstein. 1975. Studies on the  
32 mechanism of phagocytosis. I. Requirements for circumferential  
33 attachment of particle-bound ligands to specific receptors on the  
34 macrophage plasma membrane. *The Journal of experimental medicine.*  
35 142:1263-1282.
- 36 Ho, C.C., A. Keller, J.A. Odell, and R.H. Ottewill. 1993. Preparation of Monodisperse  
37 Ellipsoidal Polystyrene Particles. *Colloid Polym Sci.* 271:469-479.
- 38 Hoeller, O., P. Bolourani, J. Clark, L.R. Stephens, P.T. Hawkins, O.D. Weiner, G.  
39 Weeks, and R.R. Kay. 2013. Two distinct functions for PI3-kinases in  
40 macropinocytosis. *J Cell Sci.* 126:4296-4307.
- 41 Hoppe, A.D., and J.A. Swanson. 2004. Cdc42, Rac1, and Rac2 display distinct  
42 patterns of activation during phagocytosis. *Mol Biol Cell.* 15:3509-3519.
- 43 Inaba, H., K. Yoda, and H. Adachi. 2017. The F-actin-binding RapGEF GflB is  
44 required for efficient macropinocytosis in *Dictyostelium*. *J Cell Sci.*  
45 130:3158-3172.
- 46 Janetopoulos, C., J. Borleis, F. Vazquez, M. Iijima, and P. Devreotes. 2005.  
47 Temporal and spatial regulation of phosphoinositide signaling mediates  
48 cytokinesis. *Dev Cell.* 8:467-477.



- 1 Junemann, A., V. Filic, M. Winterhoff, B. Nordholz, C. Litschko, H. Schwellenbach,  
2 T. Stephan, I. Weber, and J. Faix. 2016. A Diaphanous-related formin links  
3 Ras signaling directly to actin assembly in macropinocytosis and  
4 phagocytosis. *Proc Natl Acad Sci U S A.* 113:E7464-E7473.
- 5 Kaplan, G. 1977. Differences in the mode of phagocytosis with Fc and C3  
6 receptors in macrophages. *Scand J Immunol.* 6:797-807.
- 7 Khosla, M., G.B. Spiegelman, R. Insall, and G. Weeks. 2000. Functional overlap of  
8 the dictyostelium RasG, RasD and RasB proteins. *J Cell Sci.* 113 ( Pt  
9 8):1427-1434.
- 10 King, J.S., and R.R. Kay. 2019. The origins and evolution of macropinocytosis.  
11 *Philos Trans R Soc Lond B Biol Sci.* 374:20180158.
- 12 Machesky, L.M., and R.H. Insall. 1998. Scar1 and the related Wiskott-Aldrich  
13 syndrome protein, WASP, regulate the actin cytoskeleton through the  
14 Arp2/3 complex. *Curr Biol.* 8:1347-1356.
- 15 Marinovic, M., L. Mijanovic, M. Sostar, M. Vizovisek, A. Junemann, M. Fonovic, B.  
16 Turk, I. Weber, J. Faix, and V. Filic. 2019. IQGAP-related protein IqgC  
17 suppresses Ras signaling during large-scale endocytosis. *Proc Natl Acad  
18 Sci U S A.* 116:1289-1298.
- 19 Marshall, J.G., J.W. Booth, V. Stambolic, T. Mak, T. Balla, A.D. Schreiber, T. Meyer,  
20 and S. Grinstein. 2001. Restricted accumulation of phosphatidylinositol 3-  
21 kinase products in a plasmalemmal subdomain during Fc gamma  
22 receptor-mediated phagocytosis. *J Cell Biol.* 153:1369-1380.
- 23 Massol, P., P. Montcourrier, J.C. Guillemot, and P. Chavrier. 1998. Fc receptor-  
24 mediated phagocytosis requires CDC42 and Rac1. *EMBO J.* 17:6219-6229.
- 25 Nobes, C.D., and A. Hall. 1995. Rho, rac, and cdc42 GTPases regulate the assembly  
26 of multimolecular focal complexes associated with actin stress fibers,  
27 lamellipodia, and filopodia. *Cell.* 81:53-62.
- 28 Norbury, C.C., L.J. Hewlett, A.R. Prescott, N. Shastri, and C. Watts. 1995. Class I  
29 MHC presentation of exogenous soluble antigen via macropinocytosis in  
30 bone marrow macrophages. *Immunity.* 3:783-791.
- 31 Paschke, P., D.A. Knecht, A. Silale, D. Traynor, T.D. Williams, P.A. Thomason, R.H.  
32 Insall, J.R. Chubb, R.R. Kay, and D.M. Veltman. 2018. Rapid and efficient  
33 genetic engineering of both wild type and axenic strains of *Dictyostelium*  
34 *discoideum*. *PLoS One.* 13:e0196809.
- 35 Peter, B.J., H.M. Kent, I.G. Mills, Y. Vallis, P.J. Butler, P.R. Evans, and H.T. McMahon.  
36 2004. BAR domains as sensors of membrane curvature: the amphiphysin  
37 BAR structure. *Science.* 303:495-499.
- 38 Plak, K., D. Veltman, F. Fusetti, J. Beeksma, F. Rivero, P.J. Van Haastert, and A.  
39 Kortholt. 2013. GxcC connects Rap and Rac signaling during *Dictyostelium*  
40 development. *BMC Cell Biol.* 14:6.
- 41 Rivero, F., and M. Maniak. 2006. Quantitative and microscopic methods for  
42 studying the endocytic pathway. *Methods Mol Biol.* 346:423-438.
- 43 Sallusto, F., M. Cella, C. Danieli, and A. Lanzavecchia. 1995. Dendritic cells use  
44 macropinocytosis and the mannose receptor to concentrate  
45 macromolecules in the major histocompatibility complex class II  
46 compartment: downregulation by cytokines and bacterial products. *The  
47 Journal of experimental medicine.* 182:389-400.
- 48 Sattler, N., R. Monroy, and T. Soldati. 2013. Quantitative analysis of phagocytosis  
49 and phagosome maturation. *Methods Mol Biol.* 983:383-402.

- 1 Schlam, D., R.D. Bagshaw, S.A. Freeman, R.F. Collins, T. Pawson, G.D. Fairn, and S.  
2 Grinstein. 2015. Phosphoinositide 3-kinase enables phagocytosis of large  
3 particles by terminating actin assembly through Rac/Cdc42 GTPase-  
4 activating proteins. *Nat Commun.* 6:8623.
- 5 Somesh, B.P., C. Neffgen, M. Iijima, P. Devreotes, and F. Rivero. 2006a.  
6 Dictyostelium RacH regulates endocytic vesicular trafficking and is  
7 required for localization of vacuolin. *Traffic.* 7:1194-1212.
- 8 Somesh, B.P., G. Vlahou, M. Iijima, R.H. Insall, P. Devreotes, and F. Rivero. 2006b.  
9 RacG regulates morphology, phagocytosis, and chemotaxis. *Eukaryot Cell.*  
10 5:1648-1663.
- 11 Swanson, J.A. 2008. Shaping cups into phagosomes and macropinosomes. *Nat*  
12 *Rev Mol Cell Biol.* 9:639-649.
- 13 Swanson, J.A., and J.S. King. 2019. The breadth of macropinocytosis research.  
14 *Philos Trans R Soc Lond B Biol Sci.* 374:20180146.
- 15 Tollis, S., A.E. Dart, G. Tzircotis, and R.G. Endres. 2010. The zipper mechanism in  
16 phagocytosis: energetic requirements and variability in phagocytic cup  
17 shape. *BMC Syst Biol.* 4:149.
- 18 Veltman, D.M., G. Akar, L. Bosgraaf, and P.J. Van Haastert. 2009. A new set of  
19 small, extrachromosomal expression vectors for Dictyostelium  
20 discoideum. *Plasmid.* 61:110-118.
- 21 Veltman, D.M., M.G. Lemieux, D.A. Knecht, and R.H. Insall. 2014. PIP(3)-  
22 dependent macropinocytosis is incompatible with chemotaxis. *J Cell Biol.*  
23 204:497-505.
- 24 Veltman, D.M., T.D. Williams, G. Bloomfield, B.C. Chen, E. Betzig, R.H. Insall, and  
25 R.R. Kay. 2016. A plasma membrane template for macropinocytic cups.  
26 *eLife.* 5.
- 27 Vieira, O.V., R.J. Botelho, L. Rameh, S.M. Brachmann, T. Matsuo, H.W. Davidson, A.  
28 Schreiber, J.M. Backer, L.C. Cantley, and S. Grinstein. 2001. Distinct roles of  
29 class I and class III phosphatidylinositol 3-kinases in phagosome  
30 formation and maturation. *J Cell Biol.* 155:19-25.
- 31 Vlahou, G., and F. Rivero. 2006. Rho GTPase signaling in Dictyostelium  
32 discoideum: insights from the genome. *Eur J Cell Biol.* 85:947-959.
- 33 West, M.A., A.R. Prescott, E.L. Eskelinen, A.J. Ridley, and C. Watts. 2000. Rac is  
34 required for constitutive macropinocytosis by dendritic cells but does not  
35 control its downregulation. *Curr Biol.* 10:839-848.
- 36 Williams, T.D., S.Y. Peak-Chew, P. Paschke, and R.R. Kay. 2019. Akt and SGK  
37 protein kinases are required for efficient feeding by macropinocytosis. *J*  
38 *Cell Sci.* 132.
- 39 Williamson, C.D., and J.G. Donaldson. 2019. Arf6, JIP3, and dynein shape and  
40 mediate macropinocytosis. *Mol Biol Cell.* 30:1477-1489.
- 41

## 1 **Supplementary videos**

2

3 **Video 1:** RGBARG-GFP is enriched at the tips of macropinocytic cups. Movie of  
4 *RGBARG*- cells expressing RGBARG-GFP in axenic culture.

5

6 **Video 2:** RGBARG-GFP is enriched at the tips of phagocytic cups. *RGBARG*- cells  
7 expressing RGBARG-GFP engulfing a TRITC-labelled budded yeast.

8

9 **Video 3:** RGBARG-GFP localises to the periphery of PIP3 patches during  
10 macropinocytosis. 3D movie of cells macropinosome formation in *RGBARG*- cells  
11 expressing RGBARG-GFP and PH<sub>CRAC</sub>-RFP.

12

13 **Video 4:** PIP<sub>3</sub> dynamics and cup formation in Ax2 cells. Maximum intensity  
14 projection of Ax2 cells expressing PH<sub>CRAC</sub>-GFP, showing removal of PIP3  
15 signalling after macropinosome formation is complete.

16

17 **Video 5:** *RGBARG*- cells have larger and more persistent PIP3 patches. Maximum  
18 intensity projection of cells expressing PH<sub>CRAC</sub>-GFP.

19

20 **Video 6:** Phagocytosis of TRITC-labelled yeast by Ax2 cells expressing PH<sub>CRAC</sub>-  
21 GFP.

22

23 **Video 7:** Phagocytosis of TRITC-labelled yeast by *RGBARG*- cells expressing  
24 PH<sub>CRAC</sub>-GFP.

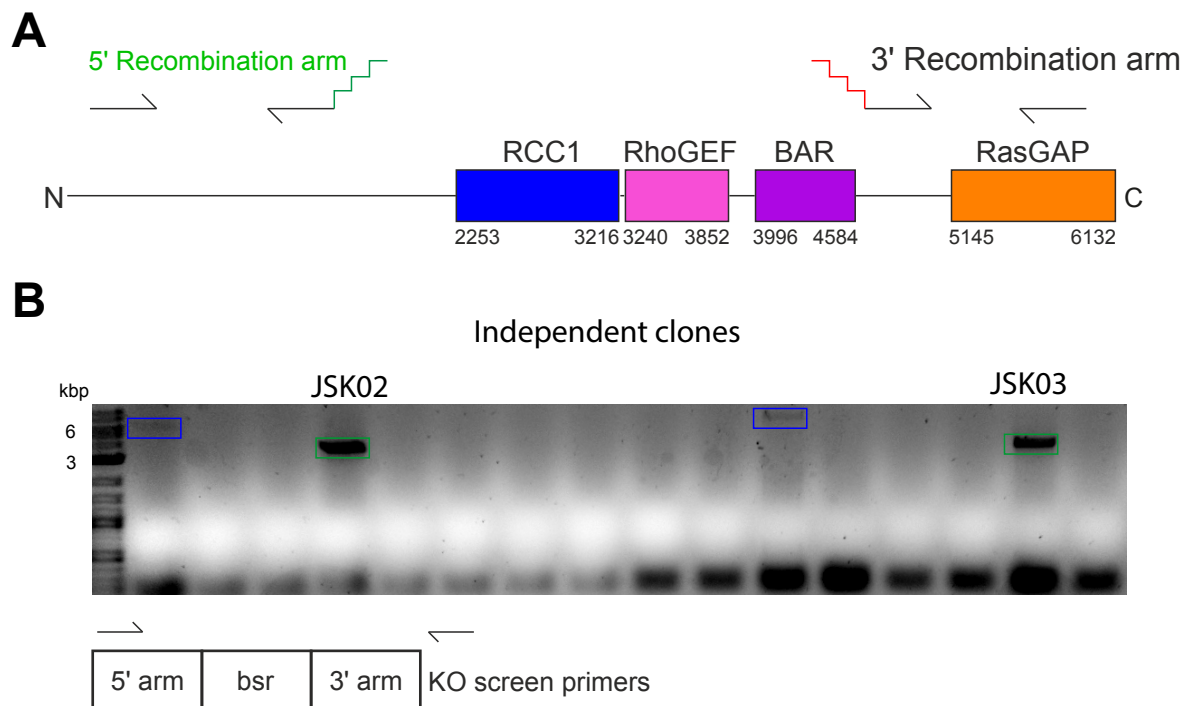

**Figure 2 supplement: Disruption of DDB\_G0269934.** (A) Schematic of the genomic locus indicating the position of the regions encoding each domain, and the 5' and 3' recombination arms amplified by PCR. These were attached either side of a blasticidin selection cassette by fusion PCR and used to transform Ax2 cells and delete ~3 kbp of the gene. (D) PCR screen of transformants, using one primer within the 5' recombination arm and another after the 3' arm. Clones with DDB\_G0269934 disrupted will give a product of 3.1 kbp (green box), the wild-type locus is 6.1 kbp (blue boxes).

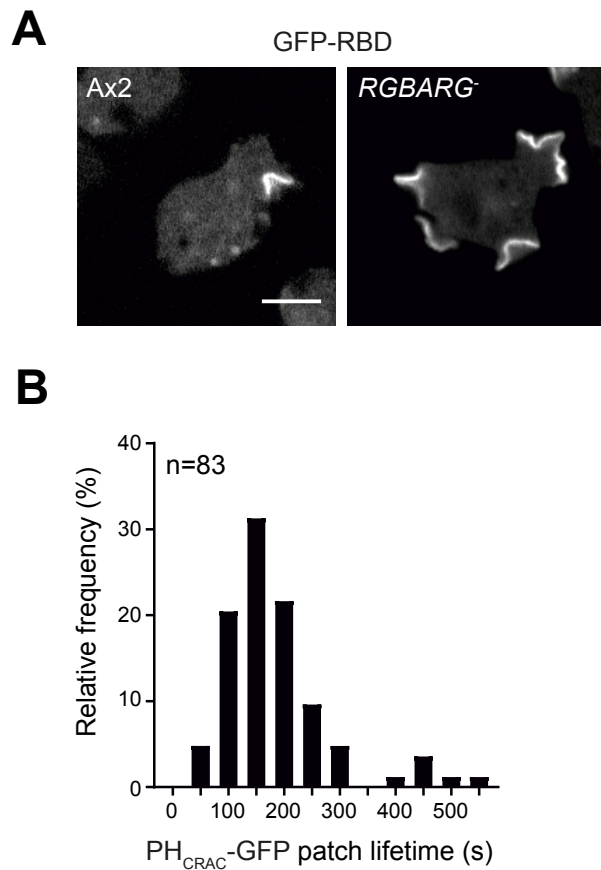

**Figure 3 supplement:** (A) Distribution of the active Ras probe RBD-GFP in wild-type and RGBARG<sup>-</sup> cells. Images are single confocal planes, bar indicates 5  $\mu$ m. (B) Histogram of PH<sub>CRAC</sub>-GFP patch lifetime in Ax2 cells from maximum projection movies. Lifetime was measured from the first frame an independent patch was visible to when it was completely removed from both the surface and any internalized vesicle.

**A**

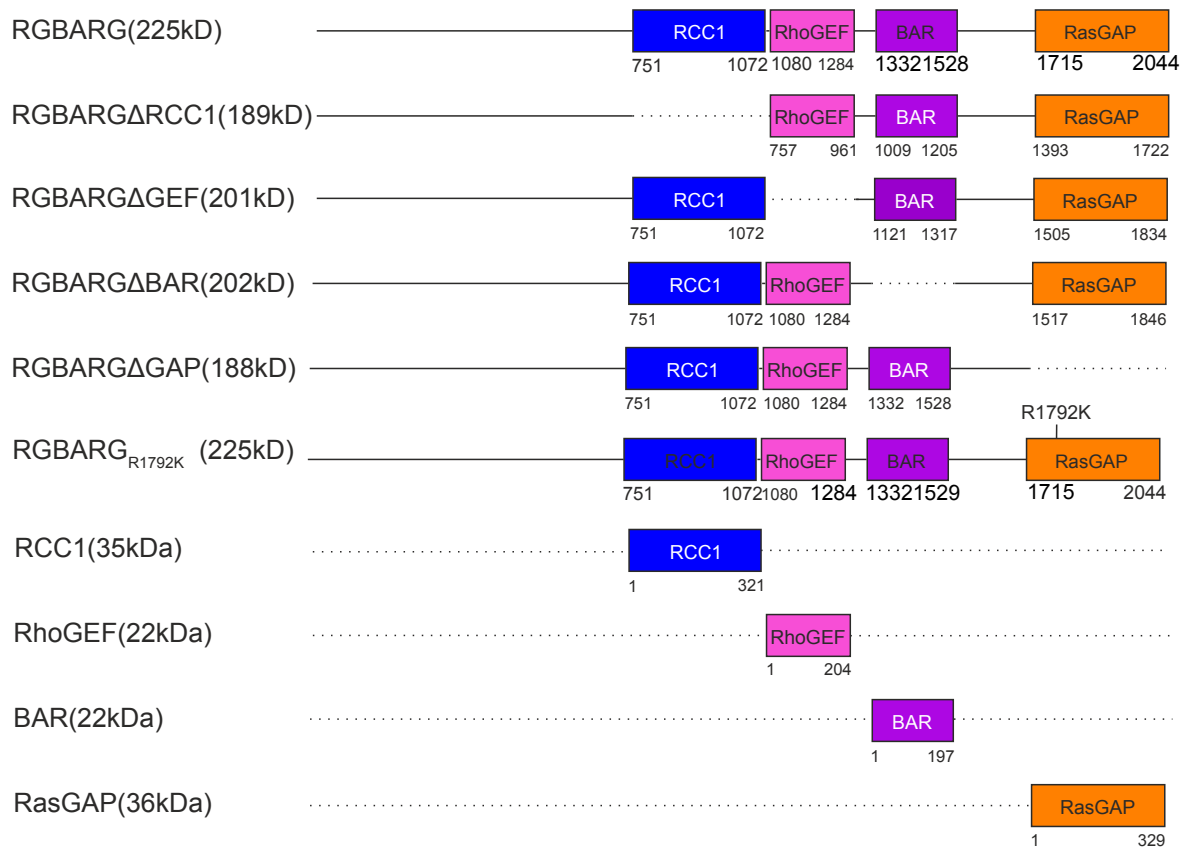

**Figure 4 Supplement 1:** Schematic of the RGBARG truncation and point mutants used in this study.



**A**

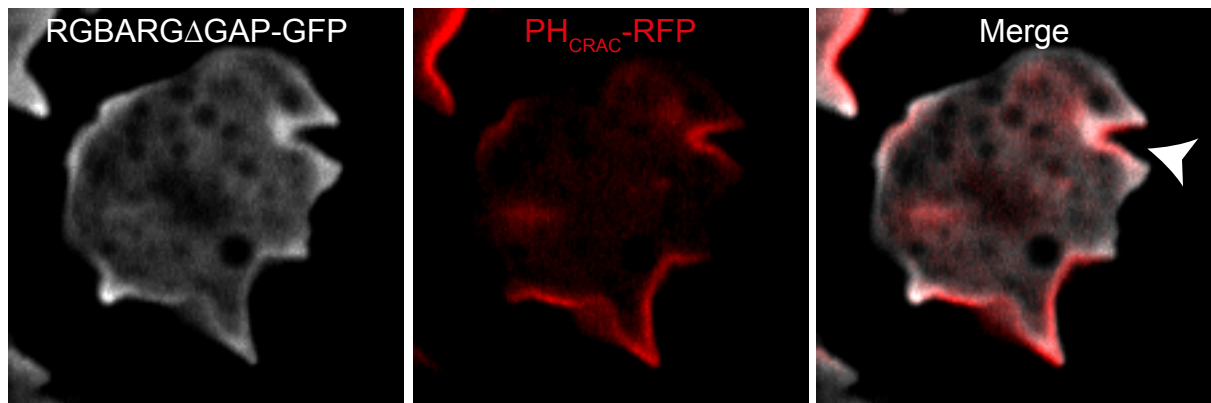

**B**

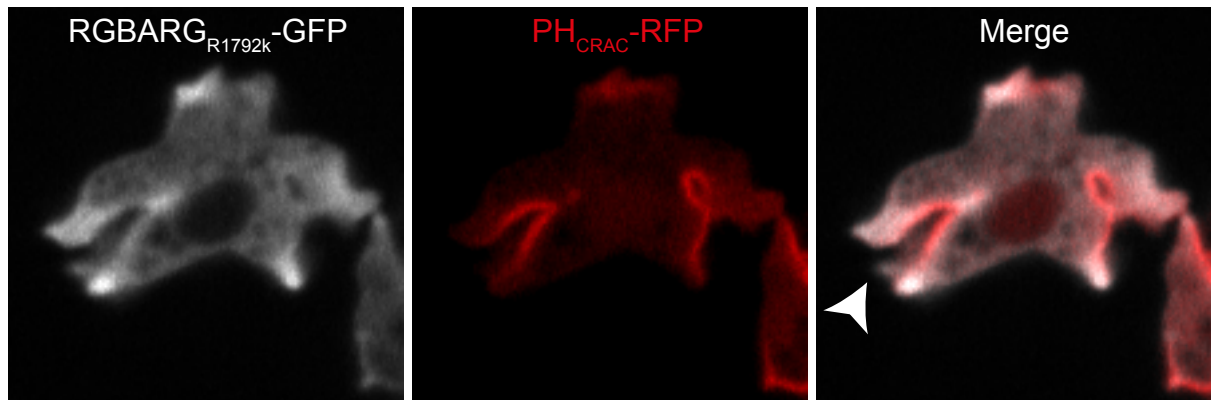

**C**

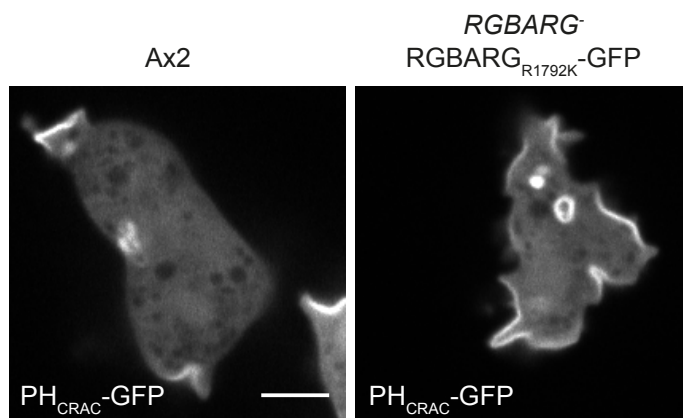

**D**

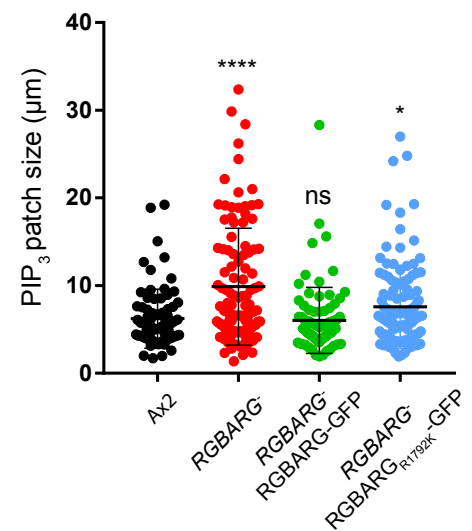

**Figure 4 Supplement 2:** (A) Co-expression of RGBARGΔRasGAP-GFP and PHCRAC-RFP in RGBARG<sup>-</sup> cells indicating that the RasGAP domain helps excluded RGBARG-GFP from PIP<sub>3</sub> rich regions of the cell. (B) The GAP activity inactivating point mutant R1792K localizes normally and is excluded from the base of protruding cups (arrowhead). (C) PHCRAC-GFP localization in Ax2 and RGBARG<sup>-</sup> cells expressing RGBARG<sub>R1792K</sub>-GFP, demonstrating that PIP<sub>3</sub> dynamics are not rescued by this construct. PHCRAC-GFP patch size is quantified in (D).

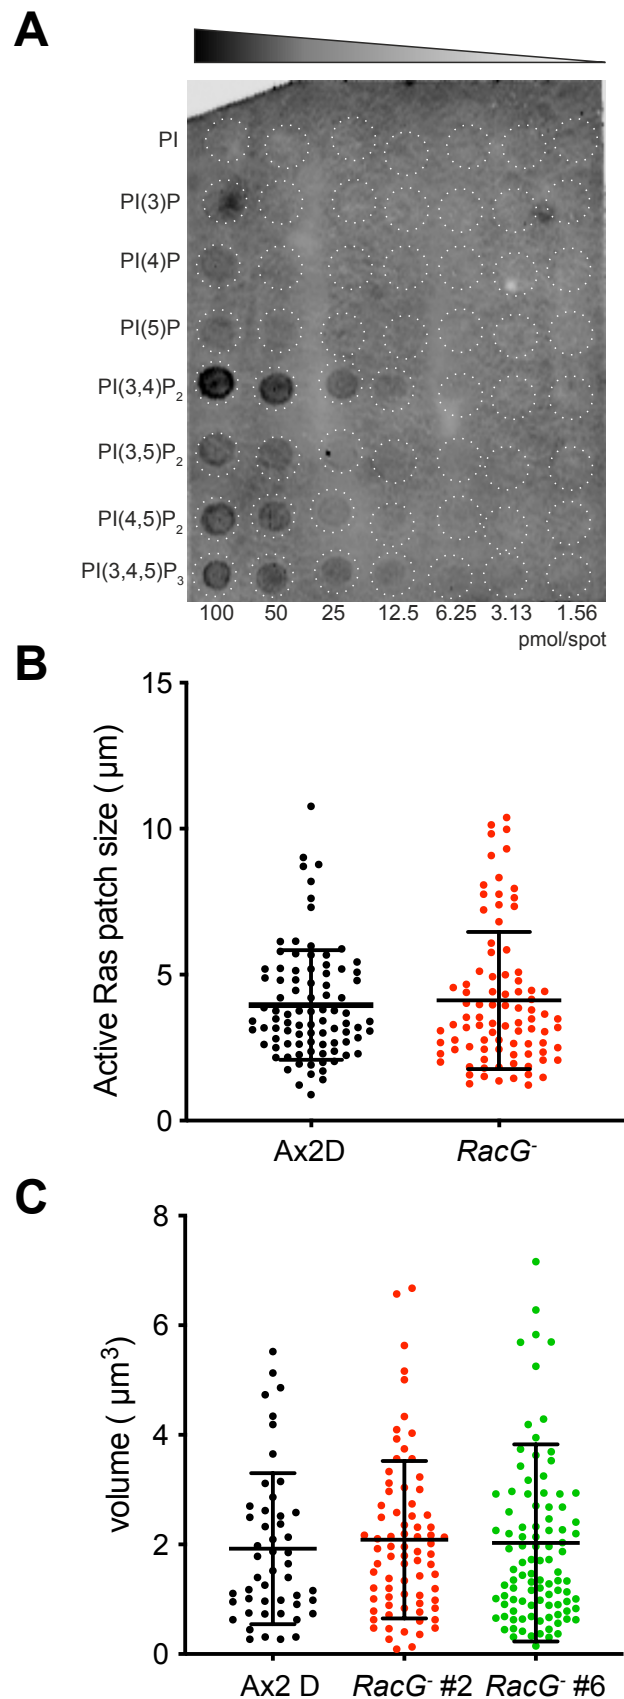

**Figure 5 Supplement:** (A) PIP array analysis of BAR-GFP binding showing a moderate preference for PI(3,4)P<sub>2</sub> in this assay. (B) Active Ras signaling during macropinosome formation in *RacG*<sup>-</sup> cells and their parental cell line Ax2D. Patch size was quantified from single confocal planes of cells expressing RBD-GFP. (C) Volume of macropinosomes formed by *RacG*<sup>-</sup> and control cells. Measured by imaging cells taking up FITC dextran. Two independent *RacG*<sup>-</sup> clones were analysed over 3 independent experiments.
